# Supplementary material for: Genome-wide association analyses of chronotype in 697,828 individuals provides insights into circadian rhythms
Source: Nat Commun. 2019 Jan 29;10:343. doi: 10.1038/s41467-018-08259-7 (PMC6351539; doi:10.1038/s41467-018-08259-7)
Supplement: Supplementary file 4 — Supplementary Data 1 [file 41467_2018_8259_MOESM4_ESM.xlsx]

## Sheet: Supp Data 1
Supplementary Data 1. Lead variants from the METAL meta-analysis of UK Biobank Chronotype and 23andMe morning person GWAS. As this was a P-value based meta-analysis, we provide the morningness ln OR from the secondary UK Biobank morning person and 23andMe morning person meta-analysis. Effect sizes and directions correspond to Allele1.
																											23andMe Morning Person				UKB Chronotype				UKB Chronotype sensitivity
Locus No.	Locus Start Pos	Locus End Pos	Novel Locus?	Lead Variant	CHR	POS	Allele1	Allele2	Freq1	FreqSE	MinFreq	MaxFreq	Weight	Meta ln OR	Meta OR	Zscore (Uncorrected)	Zscore (Corrected)	Meta P (Uncorrected)	Meta P (Corrected)	Direction	HetISq	HetChiSq	HetDf	HetPVal	Total N	Gene Context	Beta	SE	P	N	Beta	SE	P	N	Beta	SE	P	N
1	4844376	4850823	Yes	rs909757	1	4850823	T	C	0.63	0.0022	0.627	0.6317	697828	0.0197	1.0199	6.001	5.726	1.96e-09	1.03e-08	++	0	0.142	1	0.7064	697828	AJAP1-[]	0.0202702	0.00618824	0.00105377	248094	0.0136625	0.00278157	4.6e-07	449734	0.0155014	0.00363848	1.6e-05	254591
2	7622459	8497307	No	rs61773390	1	7884525	T	G	0.1931	0.0044	0.1872	0.1964	697828	0.0659	1.06812	14.061	13.416	6.549e-45	4.856e-41	++	77.8	4.5	1	0.0339	697828	[PER3]	0.0765241	0.00758741	6.29229e-24	248094	0.0340792	0.00337553	1.2e-23	449734	0.0358417	0.00441477	9.7e-16	254591
3	14448133	14567691	Yes	rs12065331	1	14507831	T	C	0.3125	0.004	0.3095	0.3179	697828	-0.0244	0.975895	-7.048	-6.724	1.821e-12	1.766e-11	--	0	0.188	1	0.6644	697828	PRDM2---[]---KAZN	-0.0301055	0.00661657	5.35334e-06	248094	-0.0159222	0.002934	6.7e-08	449734	-0.0143875	0.0038402	0.00018	254591
4	15790974	16051260	Yes	rs17448682	1	15966713	T	C	0.2339	0.0026	0.232	0.2375	697828	0.0348	1.03541	8.574	8.181	9.966e-18	2.818e-16	++	0	0.053	1	0.8173	697828	[DDI2]	0.0348947	0.00708228	8.349e-07	248094	0.0221528	0.00318247	2.2e-12	449734	0.0267341	0.00416404	1.7e-10	254591
5	19975877	20026572	No	rs10917513	1	20006887	T	C	0.6476	0.0109	0.6329	0.6557	697828	-0.0309	0.969573	-8.264	-7.885	1.409e-16	3.151e-15	--	0	0.598	1	0.4392	697828	HTR6[]-TMCO4	-0.0344579	0.00621057	2.8813e-08	248094	-0.0179024	0.00282417	6.7e-10	449734	-0.0196725	0.0036973	1.6e-07	254591
6	21030372	21569353	Yes	rs10916892	1	21201325	T	C	0.6203	0.0065	0.6115	0.6252	697828	-0.0345	0.966088	-9.337	-8.909	9.899e-21	5.165e-19	--	0	0.249	1	0.6178	697828	[EIF4G3]	-0.0364572	0.00610916	2.40272e-09	248094	-0.0199965	0.00278123	6.1e-13	449734	-0.0184531	0.00363631	3.5e-07	254591
7	24321935	24321935	Yes	rs2506089	1	24321935	T	G	0.5682	0.0006	0.5675	0.5686	697828	0.0198	1.02	5.818	5.551	5.95e-09	2.837e-08	++	21.6	1.275	1	0.2589	697828	SRSF10--[]--MYOM3	0.0280711	0.00641588	1.21138e-05	248094	0.010518	0.00270899	6.4e-05	449734	0.0097548	0.00354297	0.0067	254591
8	62570321	62579891	No	rs12140153	1	62579891	T	G	0.0892	0.0081	0.0783	0.0953	697828	-0.0604	0.941388	-9.303	-8.877	1.359e-20	6.894e-19	--	0	0.023	1	0.8798	697828	[INADL]	-0.0675085	0.0119142	1.43896e-08	248094	-0.0340109	0.00468803	1.6e-13	449734	-0.0350544	0.00612999	1.2e-08	254591
9	66825944	67005622	Yes	rs11208844	1	66851147	A	G	0.1408	0.0037	0.138	0.1457	697828	-0.029	0.971416	-6.116	-5.835	9.614e-10	5.377e-09	--	0	0.014	1	0.9067	697828	PDE4B--[]---SGIP1	-0.0315486	0.00843522	0.000183574	248094	-0.0191052	0.00389365	1.3e-06	449734	-0.0203731	0.00508188	7.1e-05	254591
10	77550431	78391121	No	rs12040629	1	77705365	A	G	0.16	0.0009	0.1588	0.1607	697828	0.0727	1.07541	14.762	14.085	2.568e-49	4.71e-45	++	71.3	3.48	1	0.06211	697828	PIGK--[]--AK5	0.0834585	0.00810446	7.06907e-25	248094	0.0391561	0.00364815	6.7e-27	449734	0.0397502	0.00476688	7.1e-17	254591
11	79826289	80098941	Yes	rs11588913	1	79963816	A	G	0.4037	0.0072	0.3983	0.4134	697828	-0.0236	0.976676	-6.6	-6.297	4.112e-11	3.032e-10	--	0	0.371	1	0.5425	697828	ELTD1---[]	-0.0208245	0.00604273	0.000568208	248094	-0.0154525	0.00273856	1.5e-08	449734	-0.021234	0.00358191	3.1e-09	254591
12	81657831	81680852	Yes	rs5016898	1	81672013	T	C	0.4238	0.0034	0.4192	0.4263	697828	-0.0241	0.976188	-6.524	-6.225	6.832e-11	4.818e-10	--	28.3	1.394	1	0.2377	697828	[]---LPHN2	-0.0291212	0.00601951	1.31044e-06	248094	-0.0122526	0.00272868	5.8e-06	449734	-0.00905914	0.00357447	0.01	254591
13	90955759	91234966	No	rs72720396	1	91191582	A	G	0.7741	0.006	0.7697	0.7822	697828	-0.0416	0.959253	-9.898	-9.443	4.263e-23	3.607e-21	--	15.4	1.182	1	0.2769	697828	BARHL2-[]---ZNF644	-0.0366549	0.00728911	4.93743e-07	248094	-0.0271261	0.00318521	8.4e-18	449734	-0.0253919	0.00416478	6.1e-10	254591
14	93468982	93474305	Yes	rs481214	1	93469865	A	T	0.6063	0.0058	0.6019	0.6141	697828	0.0232	1.02347	5.877	5.608	4.165e-09	2.049e-08	++	0	0.113	1	0.7366	697828	FAM69A--[]--MTF2	0.0202262	0.00625361	0.00121875	248094	0.0132244	0.00274208	8.7e-07	449734	0.0110141	0.00358646	0.0021	254591
15	95899507	97606480	Yes	rs11165655	1	96959104	A	G	0.5281	0.0053	0.5242	0.5352	697828	-0.0281	0.972291	-7.579	-7.231	3.479e-14	4.782e-13	--	0	0.117	1	0.7318	697828	[]---PTBP2	-0.0285978	0.00596529	1.63295e-06	248094	-0.0157164	0.00268854	4.1e-09	449734	-0.0141885	0.00351432	3.5e-05	254591
16	109887191	110155524	Yes	rs17575798	1	110086451	A	G	0.1918	0.0014	0.19	0.1928	697828	-0.0336	0.966958	-7.937	-7.573	2.076e-15	3.66e-14	--	0	0.143	1	0.7055	697828	[GPR61]	-0.0337414	0.00761949	9.46939e-06	248094	-0.0225553	0.00339377	4.2e-11	449734	-0.019545	0.00444181	1.1e-05	254591
17	113089696	113219388	Yes	rs6690292	1	113188419	T	C	0.7285	0.0005	0.7278	0.7289	697828	-0.0247	0.975603	-5.93	-5.657	3.037e-09	1.536e-08	--	0	0.085	1	0.7712	697828	[CAPZA1]	-0.0252354	0.00669549	0.000163906	248094	-0.0134534	0.00301214	4.5e-06	449734	-0.0193595	0.00393662	4.4e-07	254591
18	115055383	115109441	Yes	rs11102807	1	115061584	A	G	0.5361	0.0024	0.5328	0.5379	697828	-0.0219	0.978338	-6.044	-5.767	1.504e-09	8.089e-09	--	0	0.322	1	0.5705	697828	TRIM33-[]--BCAS2	-0.0187399	0.00595245	0.00164213	248094	-0.0130664	0.00270365	2.1e-07	449734	-0.011133	0.00353843	0.00093	254591
19	149854890	150958836	No	rs9436119	1	150467753	A	G	0.3842	0.0143	0.365	0.3948	697828	0.0395	1.04029	11.92	11.373	9.311e-33	5.697e-30	++	55.2	2.23	1	0.1353	697828	[TARS2]	0.052516	0.00632312	9.86939e-17	248094	0.0234899	0.00273835	4e-18	449734	0.0312555	0.00358289	7.6e-19	254591
20	153756083	154258549	Yes	rs6665637	1	153756083	A	G	0.2804	0.0021	0.2775	0.2819	697828	-0.0196	0.980591	-6.309	-6.02	2.804e-10	1.747e-09	--	0	0.018	1	0.8931	697828	SLC27A3-[]--GATAD2B	-0.0266413	0.00688501	0.000108924	248094	-0.0152	0.00304959	6.2e-07	449734	-0.0144396	0.00399542	0.00022	254591
21	173399677	175001710	Yes	rs115073088	1	174215858	A	G	0.975	0.0019	0.9724	0.9764	697828	-0.0755	0.92728	-7.26	-6.927	3.879e-13	4.311e-12	--	0	0.027	1	0.8692	697828	[RABGAP1L]	-0.0767345	0.0182855	2.71055e-05	248094	-0.0524798	0.00893134	3.1e-09	449734	-0.0439361	0.0116279	0.0002	254591
22	179307218	179551652	Yes	rs975025	1	179338327	T	C	0.0758	0.0018	0.0734	0.0771	697828	-0.049	0.952181	-7.848	-7.488	4.212e-15	6.976e-14	--	0	0.045	1	0.832	697828	[AXDND1]	-0.051528	0.0114305	6.50085e-06	248094	-0.0321062	0.00502525	1.3e-10	449734	-0.0345739	0.0065598	1.2e-07	254591
23	181650178	184190015	No	rs1144566	1	182569626	T	C	0.029	0.0016	0.0268	0.0302	697828	0.2306	1.25936	21.723	20.726	1.24e-104	2e-95	++	96.2	26.115	1	3.217e-07	697828	[RGS16]	0.312112	0.018366	3.2047e-65	248094	0.113367	0.00783578	5.8e-47	449734	0.113598	0.0102568	2.5e-28	254591
24	189943510	190106607	Yes	rs146820337	1	190095126	D	I	0.4751	0	0.4751	0.4751	248094	-0.0397602	0.96102	-6.686	-6.379	2.296e-11	1.782e-10	?-	0	0	0	1	248094	[FAM5C]	-0.0397602	0.00594755	2.29573e-11	248094	-	-	-	-	-	-	-	-
25	193061330	193362124	Yes	rs1221502	1	193276975	A	C	0.7386	0.0009	0.7379	0.7398	697828	0.0197	1.0199	5.951	5.678	2.666e-09	1.364e-08	++	0	0.064	1	0.8003	697828	CDC73--[]	0.0226602	0.00677441	0.000822189	248094	0.0149944	0.00305065	8.3e-07	449734	0.0152816	0.00399508	0.00014	254591
26	195444102	195564150	Yes	rs4657983	1	195454557	A	G	0.6511	0.0031	0.6469	0.6534	697828	-0.0252	0.975115	-6.815	-6.502	9.453e-12	7.931e-11	--	18.3	1.223	1	0.2687	697828	[]---KCNT2	-0.0309476	0.00625074	7.37739e-07	248094	-0.0135543	0.00282135	1.5e-06	449734	-0.0137393	0.00368469	0.00014	254591
27	241135110	241137033	Yes	rs6429233	1	241137033	A	G	0.4574	0.007	0.4522	0.4669	697828	0.0202	1.02041	5.973	5.699	2.325e-09	1.204e-08	++	0	0.008	1	0.9308	697828	[RGS7]	0.0216898	0.00597312	0.000281965	248094	0.0129167	0.00270164	2.1e-06	449734	0.0133018	0.00353774	0.00014	254591
28	4610904	4653622	Yes	rs13011556	2	4651923	C	G	0.7624	0.0014	0.7614	0.7643	697828	-0.0285	0.971902	-7.781	-7.424	7.209e-15	1.139e-13	--	53.1	2.134	1	0.1441	697828	ALLC---[]	-0.0248014	0.00715431	0.000527099	248094	-0.0227424	0.00316075	1.1e-12	449734	-0.0163881	0.00413515	6.7e-05	254591
29	12764527	12838672	Yes	rs62124718	2	12822995	A	G	0.895	0.0017	0.8937	0.8973	697828	-0.0447	0.956284	-7.666	-7.314	1.778e-14	2.593e-13	--	52	2.083	1	0.149	697828	LPIN1---[]--TRIB2	-0.0569218	0.00993538	1.00793e-08	248094	-0.0227599	0.00436084	1.2e-07	449734	-0.0283958	0.00570677	4.1e-07	254591
30	23886149	24257682	No	rs72796401	2	24180078	A	T	0.1903	0.0018	0.189	0.1927	697828	0.0246	1.02491	7.531	7.186	5.019e-14	6.68e-13	++	0	0.703	1	0.4016	697828	[UBXN2A]	0.0287639	0.00753483	0.000134874	248094	0.0219581	0.00343008	5.9e-11	449734	0.0217835	0.00448791	1.3e-06	254591
31	25083310	25161386	Yes	rs6718511	2	25122324	A	G	0.557	0.0126	0.5476	0.574	697828	0.0209	1.02112	6.001	5.726	1.961e-09	1.03e-08	++	0	0.672	1	0.4123	697828	[ADCY3]	0.0257332	0.00607472	2.27163e-05	248094	0.0119548	0.00269385	1.5e-05	449734	0.00972631	0.0035272	0.0055	254591
32	32561195	32849207	Yes	rs11678584	2	32563426	A	T	0.8599	0.0018	0.8575	0.8613	697828	-0.0278	0.972583	-6.161	-5.878	7.241e-10	4.152e-09	--	37.9	1.61	1	0.2044	697828	YIPF4--[]--BIRC6	-0.0408408	0.00870388	2.70386e-06	248094	-0.0170393	0.00389371	2.8e-05	449734	-0.0177659	0.0050971	0.0006	254591
33	36691951	36704144	Yes	rs848552	2	36700580	C	G	0.4755	0.0043	0.4723	0.4813	697828	-0.0282	0.972194	-7.897	-7.535	2.855e-15	4.894e-14	--	0	0.847	1	0.3574	697828	[CRIM1]	-0.0325928	0.00598338	5.10552e-08	248094	-0.0153219	0.00268579	7e-09	449734	-0.0133236	0.00351089	0.00011	254591
34	41385367	41388848	Yes	rs7602499	2	41385367	T	C	0.3536	0.0098	0.3463	0.3668	697828	0.0223	1.02255	5.776	5.511	7.634e-09	3.562e-08	++	0	0.644	1	0.4223	697828	SLC8A1---[]---C2orf91	0.0259872	0.00635645	4.34399e-05	248094	0.0119148	0.00283306	3.2e-05	449734	0.012749	0.00370458	0.00042	254591
35	43936230	44882800	Yes	rs75120545	2	44271496	T	C	0.0319	0.0023	0.0302	0.0349	697828	0.0862	1.09002	8.751	8.35	2.109e-18	6.842e-17	++	0	0.456	1	0.4993	697828	LRPPRC--[]---PPM1B	0.0847269	0.0181212	2.9297e-06	248094	0.0613917	0.00828587	1.1e-13	449734	0.0522827	0.0108382	1.6e-06	254591
36	46836439	46868319	Yes	rs6544906	2	46863872	A	C	0.5616	0.0045	0.5556	0.5649	697828	0.0233	1.02357	6.494	6.196	8.375e-11	5.801e-10	++	46.7	1.876	1	0.1708	697828	CRIPT--[]--SOCS5	0.0298696	0.00600875	6.64838e-07	248094	0.0119205	0.00270644	1.1e-05	449734	0.0130514	0.00354188	0.00035	254591
37	48246577	48277490	Yes	rs17396357	2	48252311	T	C	0.3818	0.0035	0.3792	0.3866	697828	0.0211	1.02132	5.858	5.59	4.675e-09	2.277e-08	++	78.2	4.579	1	0.03237	697828	FBXO11---[]---FOXN2	0.0319837	0.00613795	1.87872e-07	248094	0.00932025	0.00277137	0.00061	449734	0.00954848	0.00362419	0.0082	254591
38	49286400	50663544	Yes	rs12470914	2	50532840	A	T	0.1005	0.0022	0.0975	0.1021	697828	0.053	1.05443	8.86	8.454	7.997e-19	2.827e-17	++	72.2	3.595	1	0.05796	697828	[NRXN1]	0.0686561	0.0100895	1.01085e-11	248094	0.0261187	0.00443933	2.2e-09	449734	0.0273972	0.00580897	1.9e-06	254591
39	53715181	53756556	Yes	rs4672458	2	53736362	T	C	0.4764	0.0033	0.4739	0.4808	697828	-0.0224	0.977849	-6.697	-6.39	2.129e-11	1.663e-10	--	31	1.45	1	0.2285	697828	[]---ASB3	-0.018063	0.00596865	0.00247501	248094	-0.0162709	0.00268601	1.1e-09	449734	-0.0160181	0.00351599	7.2e-06	254591
40	54275162	54275162	No	rs13414393	2	54275162	T	C	0.5405	0.0002	0.5403	0.5406	697828	-0.0219	0.978338	-6.092	-5.812	1.116e-09	6.161e-09	--	0	0.005	1	0.9433	697828	PSME4--[]--ACYP2	-0.0213271	0.00596547	0.000349993	248094	-0.0133789	0.002697	8.1e-07	449734	-0.00979102	0.00353374	0.0075	254591
41	59402198	59435619	Yes	rs10175975	2	59429807	T	C	0.1853	0.0065	0.1805	0.1941	697828	0.0252	1.02552	6.386	6.093	1.703e-10	1.108e-09	++	77.3	4.401	1	0.03592	697828	FANCL---[]	0.016074	0.00756914	0.0337053	248094	0.0228441	0.00351376	1.8e-10	449734	0.018914	0.00460285	4.9e-05	254591
42	60364924	60681187	Yes	rs359248	2	60477461	T	G	0.4564	0.0113	0.448	0.4716	697828	-0.0275	0.972875	-8.604	-8.209	7.694e-18	2.226e-16	--	52.3	2.094	1	0.1478	697828	[]---BCL11A	-0.0377207	0.00599554	3.13248e-10	248094	-0.0161518	0.00270985	1.5e-09	449734	-0.0169347	0.00353935	2.8e-06	254591
43	61330217	61799575	Yes	rs812925	2	61680993	C	G	0.6458	0.004	0.6404	0.6488	697828	-0.0306	0.969863	-8.754	-8.352	2.062e-18	6.702e-17	--	0	0.067	1	0.7964	697828	[USP34]	-0.0311388	0.00621254	5.37626e-07	248094	-0.0205641	0.00280786	6.9e-13	449734	-0.0192881	0.00367556	1.9e-07	254591
44	66730783	66799986	Yes	rs113851554	2	66750564	T	G	0.0567	0.0007	0.0558	0.0572	697828	-0.054	0.947432	-7.728	-7.374	1.089e-14	1.659e-13	--	0	0.025	1	0.8736	697828	[MEIS1]	-0.0673173	0.0142201	2.18138e-06	248094	-0.0357353	0.00598996	1e-09	449734	-0.02706	0.00783718	0.00044	254591
45	69799971	70488470	Yes	rs2706762	2	70488470	T	C	0.1496	0.0002	0.1492	0.1497	697828	-0.037	0.963676	-7.938	-7.574	2.049e-15	3.617e-14	--	0	0.672	1	0.4125	697828	[PCYOX1]	-0.0449068	0.00833175	6.99927e-08	248094	-0.0219218	0.00375432	4e-09	449734	-0.0308684	0.00490356	3.4e-10	254591
46	75445544	75453589	Yes	rs12464387	2	75445544	A	G	0.4638	0.0048	0.4603	0.4702	697828	-0.0214	0.978827	-6.393	-6.1	1.622e-10	1.06e-09	--	0	0.025	1	0.8741	697828	TACR1--[]---EVA1A	-0.0235657	0.0059824	8.1709e-05	248094	-0.0136686	0.0026961	4.7e-07	449734	-0.0148306	0.00352642	2.7e-05	254591
47	76241021	76396057	Yes	rs6727752	2	76361783	A	G	0.3569	0.0222	0.327	0.3734	697828	0.0256	1.02593	6.647	6.342	2.993e-11	2.269e-10	++	0	0.32	1	0.5716	697828	GCFC2---[]---LRRTM4	0.0231252	0.00658997	0.000449517	248094	0.0156947	0.00277464	1.4e-08	449734	0.0150987	0.00363035	2.1e-05	254591
48	77018329	77921422	Yes	rs10520176	2	77217310	T	C	0.4926	0.0125	0.4758	0.5019	697828	0.0377	1.03842	10.606	10.119	2.799e-26	4.542e-24	++	0	0.001	1	0.9722	697828	[LRRTM4]	0.0385831	0.00612888	3.05822e-10	248094	0.0231498	0.00268932	1.4e-17	449734	0.0204023	0.00352186	6.2e-09	254591
49	88745433	88950916	Yes	rs11681299	2	88901732	T	C	0.2835	0.005	0.2768	0.2872	697828	0.0237	1.02398	6.098	5.818	1.077e-09	5.964e-09	++	77.3	4.413	1	0.03566	697828	[EIF2AK3]	0.0353152	0.00663542	1.02482e-07	248094	0.0111091	0.00296094	0.00027	449734	0.010316	0.00386828	0.01	254591
50	101578022	101647894	Yes	rs34509802	2	101591710	A	G	0.1785	0.0001	0.1784	0.1786	697828	0.0396	1.04039	7.432	7.091	1.068e-13	1.33e-12	++	82.2	5.624	1	0.01772	697828	[NPAS2]	0.0505757	0.00798326	2.36935e-10	248094	0.0153653	0.00349675	5.3e-06	449734	0.0197473	0.00456976	9.6e-06	254591
51	125438641	125438641	Yes	rs76064513	2	125438641	T	C	0.1342	0.0065	0.1294	0.143	697828	0.0338	1.03438	5.803	5.536	6.531e-09	3.089e-08	++	52.7	2.115	1	0.1458	697828	[CNTNAP5]	0.0417458	0.0090213	3.70294e-06	248094	0.0153565	0.00405038	0.00015	449734	0.0195047	0.00528957	0.00028	254591
52	136393658	136490731	Yes	rs77248969	2	136490731	A	G	0.1116	0.0296	0.0896	0.1514	697828	-0.0333	0.967248	-6.132	-5.85	8.694e-10	4.906e-09	--	0	0.061	1	0.8042	697828	R3HDM1-[]-UBXN4	-0.0336413	0.00872779	0.000115679	248094	-0.0218121	0.00470922	1.8e-06	449734	-0.019459	0.00615562	0.0011	254591
53	144151161	144389635	Yes	rs28380327	2	144232491	A	T	0.6317	0.0035	0.6291	0.6364	697828	0.04	1.04081	10.825	10.329	2.614e-27	5.237e-25	++	81.6	5.446	1	0.01961	697828	[ARHGAP15]	0.0515494	0.00619116	8.21446e-17	248094	0.0205097	0.00277698	2.9e-13	449734	0.0196685	0.00362826	5.6e-08	254591
54	149376864	149551658	Yes	rs2166559	2	149551658	T	C	0.8611	0.0015	0.86	0.8631	697828	-0.0329	0.967635	-6.329	-6.039	2.468e-10	1.555e-09	--	19.8	1.247	1	0.2641	697828	EPC2-[]--KIF5C	-0.0252718	0.00878287	0.0040115	248094	-0.0218336	0.00387088	9.1e-09	449734	-0.0277653	0.00507316	4.5e-08	254591
55	161894663	161916409	Yes	rs747003	2	161916409	T	C	0.6088	0.0029	0.6067	0.6128	697828	0.0196	1.01979	5.822	5.555	5.826e-09	2.783e-08	++	0	0.62	1	0.4309	697828	RBMS1---[]--TANK	0.0173839	0.00612374	0.00452735	248094	0.0145949	0.00275473	2.7e-07	449734	0.0166478	0.00360947	7.1e-06	254591
56	174019920	174048371	Yes	rs13004345	2	174037347	T	C	0.6475	0.0073	0.6377	0.6529	697828	-0.0189	0.981277	-6.27	-5.982	3.619e-10	2.205e-09	--	0	0.22	1	0.6389	697828	[ZAK]	-0.0254581	0.00618672	3.87169e-05	248094	-0.013239	0.00281783	2e-06	449734	-0.0131454	0.00369109	0.00031	254591
57	175200414	175241482	Yes	rs6433478	2	175241482	T	C	0.4601	0.0072	0.4548	0.4698	697828	-0.0253	0.975017	-7.11	-6.784	1.162e-12	1.172e-11	--	73.4	3.753	1	0.0527	697828	[CIR1]	-0.0352661	0.00608651	6.84942e-09	248094	-0.0120062	0.00271259	5.3e-06	449734	-0.0116687	0.00354959	0.00067	254591
58	186072601	186244816	Yes	rs4666682	2	186203743	A	G	0.1797	0.0045	0.1764	0.1858	697828	-0.0254	0.97492	-6.182	-5.898	6.343e-10	3.679e-09	--	0	0.014	1	0.9053	697828	ZNF804A---[]---FSIP2	-0.029033	0.00767878	0.000155942	248094	-0.0173076	0.00351886	1e-06	449734	-0.0207016	0.00460165	7.3e-06	254591
59	191578172	191710069	Yes	rs11677484	2	191578172	T	G	0.2574	0.0022	0.2557	0.2604	697828	0.0229	1.02316	6.376	6.083	1.819e-10	1.177e-09	++	56.7	2.307	1	0.1288	697828	B1--[]---GLS	0.0175042	0.00677828	0.00981307	248094	0.0185564	0.00309256	1.7e-09	449734	0.014484	0.00404465	0.0003	254591
60	198144002	199054124	No	rs1064213	2	198950240	A	G	0.4826	0.0067	0.4777	0.4916	697828	0.0444	1.0454	12.165	11.607	4.78e-34	3.81e-31	++	95	20.076	1	7.443e-06	697828	[PLCL1]	0.0646767	0.00596219	1.98516e-27	248094	0.019141	0.00268602	1.3e-12	449734	0.0194557	0.0035123	2.9e-08	254591
61	206833858	207066474	Yes	rs184033703	2	206956138	A	G	0.0585	0.0007	0.058	0.0594	697828	0.0577	1.0594	7.761	7.405	8.408e-15	1.31e-13	++	0	0.202	1	0.6531	697828	INO80D-[]--NDUFS1	0.0539395	0.012641	1.98248e-05	248094	0.0377937	0.00576165	8.1e-11	449734	0.0319503	0.00755068	2.4e-05	254591
62	239044338	239540279	No	rs80271258	2	239311505	T	C	0.0844	0.0037	0.0794	0.0871	697828	-0.0894	0.91448	-14.427	-13.765	3.521e-47	4.162e-43	--	0	0.055	1	0.814	697828	TRAF3IP1-[]--ASB1	-0.096242	0.0109572	1.48484e-18	248094	-0.0549164	0.00476547	2.6e-30	449734	-0.0487665	0.00625727	7.1e-15	254591
63	240265617	240298328	Yes	rs62182135	2	240267305	A	C	0.3285	0.0043	0.3227	0.3317	697828	-0.0242	0.97609	-7.455	-7.113	8.968e-14	1.134e-12	--	0	0.222	1	0.6373	697828	[HDAC4]	-0.0258325	0.00635265	4.76769e-05	248094	-0.0179439	0.00284795	3.7e-10	449734	-0.0205068	0.00372529	3.6e-08	254591
64	2435147	2574669	Yes	rs35346733	3	2521322	A	G	0.1942	0.001	0.1928	0.1949	697828	-0.0316	0.968894	-6.54	-6.24	6.137e-11	4.369e-10	--	0	0.117	1	0.7322	697828	[CNTN4]	-0.031554	0.00755974	2.98656e-05	248094	-0.0175843	0.00341396	4.5e-07	449734	-0.0166813	0.00447181	0.0002	254591
65	7105101	7212512	Yes	rs111261826	3	7189617	A	C	0.679	0.0008	0.6778	0.6796	697828	-0.028	0.972388	-6.926	-6.608	4.322e-12	3.885e-11	--	0	0.779	1	0.3775	697828	[GRM7]	-0.0307827	0.0063624	1.30955e-06	248094	-0.0143458	0.00287969	4.8e-07	449734	-0.0169928	0.00376682	4.2e-06	254591
66	8807423	9052624	Yes	rs149611468	3	8817423	T	C	0.9888	0.001	0.988	0.9902	697828	0.1432	1.15396	8.176	7.801	2.941e-16	6.163e-15	++	0	0.516	1	0.4727	697828	OXTR-[]---RAD18	0.173914	0.0319675	5.00147e-08	248094	0.0776374	0.0125983	8.5e-10	449734	0.0796669	0.0164329	1.4e-06	254591
67	14371297	14402491	Yes	rs6794796	3	14383632	A	G	0.2897	0.0032	0.2873	0.294	697828	0.0253	1.02562	6.598	6.295	4.164e-11	3.067e-10	++	0	0.822	1	0.3646	697828	LSM3---[]--SLC6A6	0.0209345	0.00652893	0.00134412	248094	0.0172176	0.00296536	5.3e-09	449734	0.0170791	0.00388437	1.1e-05	254591
68	17988979	18391667	Yes	rs9817910	3	18246870	A	G	0.5576	0.0082	0.5465	0.5637	697828	-0.0216	0.978632	-6.686	-6.379	2.299e-11	1.784e-10	--	58.6	2.415	1	0.1202	697828	[LOC339862]	-0.0163927	0.00598521	0.00616457	248094	-0.0170371	0.00270846	3.1e-10	449734	-0.0201816	0.00354416	9.2e-09	254591
69	23187351	23638952	Yes	rs73050286	3	23224684	T	C	0.7817	0.003	0.7777	0.7839	697828	0.0297	1.03015	6.942	6.623	3.876e-12	3.517e-11	++	0	0	1	0.9916	697828	[]--UBE2E2	0.0298691	0.00720263	3.36197e-05	248094	0.0178095	0.00326167	2.6e-08	449734	0.016809	0.0042699	8.1e-05	254591
70	24917378	24953417	Yes	rs2362775	3	24924421	T	C	0.5342	0.0102	0.5266	0.548	697828	-0.0218	0.978436	-6.096	-5.816	1.089e-09	6.025e-09	--	88.6	8.743	1	0.003107	697828	THRB---[]---RARB	-0.00756618	0.00600097	0.207371	248094	-0.0180186	0.0027019	2.8e-11	449734	-0.0182386	0.0035374	2.9e-07	254591
71	36834668	36920405	Yes	rs114848860	3	36859494	A	T	0.9737	0.0025	0.9702	0.9755	697828	-0.0768	0.926075	-7.775	-7.418	7.556e-15	1.189e-13	--	0	0.002	1	0.9614	697828	DCLK3--[]-TRANK1	-0.0951013	0.0206886	4.28808e-06	248094	-0.0555837	0.00872612	3.6e-10	449734	-0.0516991	0.0113929	9.7e-06	254591
72	46764220	46986452	Yes	rs78580841	3	46986452	T	C	0.0694	0.0028	0.0657	0.0714	697828	0.0424	1.04331	6.944	6.626	3.807e-12	3.46e-11	++	0	0.292	1	0.5888	697828	[CCDC12]	0.0456321	0.0123108	0.000210117	248094	0.0309392	0.0053556	3.7e-09	449734	0.0332017	0.00702772	1.9e-06	254591
73	47530595	52532118	Yes	rs12636669	3	50003323	T	C	0.0801	0.0026	0.0766	0.082	697828	0.057	1.05866	9.335	8.907	1.01e-20	5.26e-19	++	4.3	1.045	1	0.3066	697828	[RBM6]	0.0708472	0.0110933	1.69448e-10	248094	0.0343448	0.00497499	5.8e-12	449734	0.0269877	0.00652365	3.3e-05	254591
74	70594975	70594975	Yes	rs17007397	3	70594975	C	G	0.5801	0.004	0.5771	0.5855	697828	0.0231	1.02337	5.723	5.46	1.046e-08	4.748e-08	++	8.9	1.098	1	0.2947	697828	MITF---[]---FOXP1	0.0256997	0.00604203	2.10239e-05	248094	0.0108518	0.00272422	7.2e-05	449734	0.0132337	0.0035664	0.00018	254591
75	71353372	71632266	Yes	rs7626335	3	71575177	A	C	0.3305	0.0001	0.3304	0.3307	697828	-0.0286	0.971805	-7.214	-6.883	5.442e-13	5.87e-12	--	86.4	7.361	1	0.006666	697828	FOXP1---[]---EIF4E3	-0.0411388	0.00635023	9.2129e-11	248094	-0.0114652	0.0028667	3e-05	449734	-0.0106253	0.00374742	0.0039	254591
76	77153454	77357287	Yes	rs7429614	3	77205438	T	G	0.416	0.0031	0.4118	0.4183	697828	0.0349	1.03552	9.424	8.991	4.36e-21	2.446e-19	++	82.9	5.853	1	0.01555	697828	[ROBO2]	0.0459605	0.00607917	3.99947e-14	248094	0.0164171	0.00272259	9.2e-10	449734	0.0179626	0.00355783	2.6e-07	254591
77	81626909	83062457	Yes	rs112201801	3	82591379	T	C	0.9291	0	0.9291	0.9291	248094	-0.0851936	0.918334	-6.78	-6.469	1.202e-11	9.874e-11	?-	0	0	0	1	248094	GBE1---[]	-0.0851936	0.0125665	1.20247e-11	248094	-	-	-	-	-	-	-	-
78	83804561	83809398	Yes	rs12631477	3	83804561	T	C	0.7982	0.0014	0.7964	0.7993	697828	0.0277	1.02809	6.206	5.922	5.419e-10	3.187e-09	++	0	0.006	1	0.9403	697828	[]	0.0279092	0.00742185	0.000169353	248094	0.0168821	0.00336338	7.9e-07	449734	0.0221584	0.00439562	9.6e-07	254591
79	85393815	85849851	Yes	rs1449403	3	85591467	A	G	0.1226	0.002	0.12	0.1241	697828	0.0424	1.04331	7.537	7.191	4.807e-14	6.422e-13	++	68.5	3.176	1	0.07471	697828	[CADM2]	0.0545401	0.00920547	3.12654e-09	248094	0.0196698	0.00406748	6.1e-07	449734	0.0145	0.00533132	0.0047	254591
80	104763667	104802096	Yes	rs34967119	3	104778430	A	G	0.4958	0.0073	0.486	0.5012	697828	0.02	1.0202	5.994	5.719	2.043e-09	1.07e-08	++	0	0.102	1	0.7497	697828	[]---ALCAM	0.0229406	0.00598939	0.000127981	248094	0.0127192	0.00268499	3.8e-06	449734	0.0150949	0.00351301	2e-05	254591
81	110271943	110271943	Yes	rs1398346	3	110271943	T	C	0.8668	0.0061	0.8586	0.8713	697828	0.0259	1.02624	5.739	5.476	9.509e-09	4.353e-08	++	0	0.219	1	0.6401	697828	[]---LOC151760	0.0324763	0.00855348	0.000146222	248094	0.0175343	0.00402359	1.5e-05	449734	0.0209576	0.00525894	5e-05	254591
82	113891549	113891549	Yes	rs1800828	3	113891549	C	G	0.7508	0.0059	0.7464	0.7587	697828	0.0257	1.02603	5.881	5.611	4.088e-09	2.014e-08	++	57.9	2.376	1	0.1232	697828	[DRD3]	0.0157521	0.00694327	0.0232813	248094	0.0176235	0.00308462	1.7e-08	449734	0.0155086	0.00403236	0.00013	254591
83	116019519	116129964	Yes	rs72950188	3	116103275	T	C	0.9238	0.0013	0.9221	0.9248	697828	0.0447	1.04571	6.696	6.389	2.135e-11	1.668e-10	++	8.2	1.09	1	0.2965	697828	[LSAMP]	0.0534902	0.0110762	1.3595e-06	248094	0.0240861	0.00508928	2e-06	449734	0.0186696	0.00666748	0.0032	254591
84	123143081	123160350	Yes	rs72966564	3	123149816	T	C	0.2507	0.0021	0.2491	0.2535	697828	-0.0234	0.976872	-6.061	-5.783	1.355e-09	7.354e-09	--	29	1.409	1	0.2353	697828	[ADCY5]	-0.0194996	0.00732854	0.00779245	248094	-0.0174371	0.00312692	2.5e-08	449734	-0.018854	0.00408923	3.5e-06	254591
85	132915474	133094559	Yes	rs13065394	3	132971327	T	G	0.286	0.0033	0.2815	0.2885	697828	-0.0274	0.972972	-6.916	-6.599	4.636e-12	4.141e-11	--	0	0.405	1	0.5247	697828	[TMEM108]	-0.0239469	0.00662796	0.000302351	248094	-0.017504	0.00296404	3e-09	449734	-0.0201023	0.0038846	1.9e-07	254591
86	138130484	138154795	Yes	rs4550782	3	138132393	T	G	0.6655	0.0051	0.6586	0.6692	697828	0.0282	1.0286	7.237	6.905	4.6e-13	5.036e-12	++	0	0.129	1	0.7196	697828	MRAS-[]--ESYT3	0.0288964	0.00627818	4.1633e-06	248094	0.015797	0.00285144	2.2e-08	449734	0.0148933	0.00372727	3.7e-05	254591
87	150788032	150928122	Yes	rs7649164	3	150788032	T	G	0.5745	0.0082	0.5635	0.5805	697828	0.0211	1.02132	6.087	5.808	1.15e-09	6.332e-09	++	0	0.073	1	0.7864	697828	CLRN1--[]--MED12L	0.0242388	0.00630091	0.000119546	248094	0.0134359	0.00277539	2.3e-06	449734	0.0133801	0.00363497	0.00029	254591
88	152646244	152673145	Yes	rs6440833	3	152646244	A	G	0.4638	0.0007	0.4633	0.4647	697828	0.021	1.02122	6.422	6.127	1.345e-10	8.938e-10	++	34.8	1.533	1	0.2156	697828	P2RY1--[]---RAP2B	0.0288504	0.00598178	1.41246e-06	248094	0.0120252	0.00270216	1e-05	449734	0.0149306	0.00353693	3.2e-05	254591
89	157721819	157721819	Yes	rs111867612	3	157721819	A	C	0.1021	0.0035	0.0973	0.1047	697828	-0.032	0.968507	-5.743	-5.479	9.3e-09	4.265e-08	--	0	0.066	1	0.7971	697828	C3orf55---[]--SHOX2	-0.0328215	0.0102013	0.0012913	248094	-0.0206628	0.00442418	1.9e-06	449734	-0.0188534	0.00576517	0.0009	254591
90	160589852	161139566	Yes	rs1599374	3	160891727	A	G	0.5163	0.0064	0.5116	0.5248	697828	0.0309	1.03138	8.266	7.887	1.38e-16	3.092e-15	++	62.6	2.672	1	0.1021	697828	B3GALNT1--[]--NMD3	0.0372379	0.00596696	4.3411e-10	248094	0.0153807	0.00270337	1.5e-08	449734	0.0141126	0.00354175	6.5e-05	254591
91	172128613	172364093	Yes	rs3850174	3	172364093	A	T	0.2575	0.0005	0.2571	0.2581	697828	-0.0346	0.965992	-8.276	-7.896	1.278e-16	2.883e-15	--	0	0.629	1	0.4277	697828	[NCEH1]	-0.0385861	0.00692714	2.53065e-08	248094	-0.0194471	0.00309938	6.8e-10	449734	-0.0217613	0.00405393	1.7e-07	254591
92	176032695	176128315	Yes	rs301218	3	176096919	A	G	0.3916	0.0012	0.3908	0.3932	697828	-0.0237	0.976579	-6.72	-6.412	1.813e-11	1.437e-10	--	62.8	2.69	1	0.101	697828	ALADL2---[]---TBL1XR1	-0.0323212	0.00607177	1.01698e-07	248094	-0.0121978	0.00274639	1e-05	449734	-0.0116401	0.00359476	0.001	254591
93	181938437	182312152	Yes	rs9836621	3	182096311	T	C	0.5217	0.0056	0.5175	0.5293	697828	-0.0279	0.972486	-7.714	-7.36	1.222e-14	1.842e-13	--	86.4	7.374	1	0.006617	697828	SOX2---[]---ATP11B	-0.0403442	0.00595155	1.20703e-11	248094	-0.0127029	0.00269338	4.8e-06	449734	-0.0151785	0.00352276	2e-05	254591
94	185984707	186082149	Yes	rs1468945	3	185990392	A	G	0.7852	0.0006	0.7844	0.7856	697828	-0.0363	0.964351	-8.482	-8.093	2.205e-17	5.811e-16	--	0	0.041	1	0.8397	697828	[DGKG]	-0.0354581	0.00724323	9.8134e-07	248094	-0.0225859	0.00326992	4.2e-12	449734	-0.0250684	0.00427943	3.9e-09	254591
95	1349602	1349602	Yes	rs3796618	4	1349602	A	T	0.5293	0.0015	0.5272	0.5305	697828	-0.0229	0.97736	-6.011	-5.735	1.846e-09	9.752e-09	--	0	0.094	1	0.7594	697828	[UVSSA]	-0.0201093	0.00602423	0.000843446	248094	-0.013268	0.00269667	5.5e-07	449734	-0.0106984	0.0035299	0.0028	254591
96	2697300	2832189	Yes	rs4690085	4	2697300	A	G	0.5348	0.0075	0.5292	0.5449	697828	-0.0193	0.980885	-5.88	-5.61	4.101e-09	2.02e-08	--	40.8	1.689	1	0.1938	697828	[FAM193A]	-0.0147205	0.00597713	0.0137853	248094	-0.0147386	0.00269058	3.9e-08	449734	-0.0117755	0.00352001	0.00079	254591
97	18202615	18262623	Yes	rs4698678	4	18260776	C	G	0.2786	0.0051	0.2718	0.2823	697828	0.0307	1.03118	7.1	6.775	1.244e-12	1.248e-11	++	65	2.857	1	0.091	697828	LCORL---[]	0.0377692	0.00675597	2.26375e-08	248094	0.0140434	0.00298441	2.7e-06	449734	0.0129956	0.00390637	0.0008	254591
98	27495379	27495791	Yes	rs1502249	4	27495379	A	G	0.5223	0.0018	0.5199	0.5236	697828	0.0173	1.01745	5.826	5.559	5.673e-09	2.717e-08	++	0	0.03	1	0.8618	697828	STIM2---[]	0.0216574	0.00599334	0.000301883	248094	0.0121976	0.0026996	4.8e-06	449734	0.015455	0.0035354	1.2e-05	254591
99	66450391	66526092	Yes	rs6838677	4	66520667	A	C	0.6689	0.0005	0.6683	0.6693	697828	-0.0213	0.978925	-5.829	-5.561	5.579e-09	2.676e-08	--	0	0	1	0.9925	697828	[EPHA5]	-0.0221611	0.00639007	0.000524299	248094	-0.0133658	0.00285778	2.8e-06	449734	-0.010056	0.00374161	0.0079	254591
100	67062794	67096904	Yes	rs4860734	4	67096904	A	G	0.2897	0.0093	0.2827	0.3023	697828	0.0195	1.01969	5.83	5.562	5.551e-09	2.663e-08	++	0	0.091	1	0.7624	697828	EPHA5---[]	0.0244048	0.00656272	0.000200259	248094	0.0136894	0.00301611	6.8e-06	449734	0.0176579	0.00394891	9.1e-06	254591
101	80206272	80206272	Yes	rs6816922	4	80206272	A	C	0.5377	0.0013	0.5367	0.5394	697828	-0.02	0.980199	-5.743	-5.48	9.296e-09	4.264e-08	--	0	0.153	1	0.6961	697828	PAQR3---[]--NAA11	-0.0222802	0.00596063	0.000185503	248094	-0.0115567	0.00269893	1.2e-05	449734	-0.0134175	0.00352742	0.00012	254591
102	83153034	83293033	Yes	rs6846730	4	83279041	T	C	0.2353	0.0045	0.232	0.2414	697828	-0.0323	0.968216	-7.986	-7.62	1.389e-15	2.538e-14	--	0	0.643	1	0.4227	697828	[HNRNPD]	-0.028903	0.00701886	3.81589e-05	248094	-0.0220017	0.00317897	5.6e-12	449734	-0.0208338	0.00415463	4.7e-07	254591
103	102079676	102106356	Yes	rs2850979	4	102094764	T	C	0.7603	0.0006	0.7595	0.7607	697828	-0.0234	0.976872	-6.205	-5.921	5.453e-10	3.205e-09	--	0	0.423	1	0.5156	697828	[PPP3CA]	-0.0221737	0.00697692	0.00148241	248094	-0.0166671	0.00315303	7.9e-08	449734	-0.0154791	0.00412164	0.00017	254591
104	105317995	105343456	Yes	rs10610420	4	105317995	D	I	0.7138	0	0.7138	0.7138	248094	0.0394293	1.04022	5.99	5.716	2.093e-09	1.094e-08	?+	0	0	0	1	248094	TACR3---[]--CXXC4	0.0394293	0.00658307	2.09287e-09	248094	-	-	-	-	-	-	-	-
105	113990943	114456506	Yes	rs7700110	4	114439894	A	G	0.2566	0.0031	0.2524	0.259	697828	0.0242	1.0245	6.163	5.88	7.16e-10	4.109e-09	++	0	0.97	1	0.3248	697828	[CAMK2D]	0.0304598	0.00682204	8.0098e-06	248094	0.0133631	0.00306615	1.3e-05	449734	0.0128605	0.00400759	0.0016	254591
106	130877345	130950008	Yes	rs17455138	4	130903511	T	C	0.7655	0.0005	0.7649	0.7659	697828	0.0307	1.03118	6.772	6.461	1.274e-11	1.041e-10	++	78.9	4.738	1	0.0295	697828	C4orf33---[]	0.0409058	0.00707218	7.24766e-09	248094	0.0130292	0.00319267	3.5e-05	449734	0.0158735	0.00417785	0.00012	254591
107	132490910	132575052	Yes	rs9991917	4	132512118	A	T	0.19	0	0.19	0.19	248094	0.0452703	1.04631	5.986	5.711	2.157e-09	1.124e-08	?+	0	0	0	1	248094	[]	0.0452703	0.00756325	2.15705e-09	248094	-	-	-	-	-	-	-	-
108	136929894	137098860	Yes	rs4241964	4	137053959	T	G	0.5217	0.0043	0.516	0.5249	697828	-0.0287	0.971708	-8.43	-8.043	3.452e-17	8.743e-16	--	61.4	2.589	1	0.1076	697828	[]	-0.0225522	0.00603863	0.00018789	248094	-0.020735	0.00270449	1.1e-14	449734	-0.0224602	0.00353537	1.7e-10	254591
109	139939653	140112440	Yes	rs938836	4	139939653	A	G	0.467	0.0014	0.466	0.4688	697828	-0.0212	0.979023	-6.402	-6.109	1.529e-10	1.005e-09	--	0	0.524	1	0.469	697828	[CCRN4L]	-0.0266782	0.00606521	1.08864e-05	248094	-0.013045	0.00269582	2.5e-06	449734	-0.0135223	0.00352691	0.00024	254591
110	147216084	147591808	Yes	rs72729847	4	147296930	T	C	0.8005	0.0042	0.7948	0.8036	697828	-0.0303	0.970154	-6.731	-6.422	1.69e-11	1.347e-10	--	6.6	1.071	1	0.3007	697828	[SLC10A7]	-0.0357136	0.00737261	1.27263e-06	248094	-0.0158568	0.00338436	1.7e-06	449734	-0.0117739	0.00443252	0.0083	254591
111	163640331	163725387	Yes	rs9997394	4	163704083	A	G	0.2866	0.0056	0.279	0.2907	697828	-0.0254	0.97492	-6.396	-6.102	1.597e-10	1.045e-09	--	22.5	1.29	1	0.256	697828	FSTL5---[]---NAF1	-0.031386	0.00664274	2.2967e-06	248094	-0.0136401	0.00296075	8.3e-06	449734	-0.0194318	0.00387027	6.8e-07	254591
112	35188444	35228753	Yes	rs10058356	5	35220404	T	C	0.6958	0.0041	0.6903	0.6988	697828	-0.0207	0.979513	-6.285	-5.996	3.281e-10	2.016e-09	--	36.8	1.584	1	0.2083	697828	[PRLR]	-0.0176803	0.00645922	0.0061964	248094	-0.0169817	0.00293612	6.8e-09	449734	-0.0143281	0.00384295	0.00011	254591
113	59027048	59028759	Yes	rs67169439	5	59027048	D	I	0.6014	0	0.6014	0.6014	248094	-0.0353081	0.965308	-5.781	-5.515	7.448e-09	3.483e-08	?-	0	0	0	1	248094	[PDE4D]	-0.0353081	0.00610842	7.44762e-09	248094	-	-	-	-	-	-	-	-
114	63815327	63861475	Yes	rs7701529	5	63861475	A	T	0.2393	0.0019	0.2379	0.2418	697828	-0.0295	0.970931	-7.235	-6.903	4.667e-13	5.103e-12	--	0	0.025	1	0.8752	697828	[RGS7BP]	-0.0291251	0.00695582	2.81894e-05	248094	-0.0188448	0.00317247	3.6e-09	449734	-0.0157665	0.00415229	0.00012	254591
115	76581258	76716430	Yes	rs7721608	5	76581258	T	G	0.4648	0.0014	0.4638	0.4666	697828	0.0204	1.02061	6.285	5.997	3.269e-10	2.01e-09	++	60.6	2.537	1	0.1112	697828	[PDE8B]	0.0300665	0.00598188	4.99594e-07	248094	0.0113798	0.00269597	4.2e-05	449734	0.00894308	0.00352334	0.015	254591
116	86550690	86774931	Yes	rs66507804	5	86630284	T	C	0.799	0.0059	0.7946	0.807	697828	-0.0322	0.968313	-6.924	-6.607	4.38e-12	3.932e-11	--	16.6	1.199	1	0.2735	697828	[RASA1]	-0.0377658	0.00754136	5.5064e-07	248094	-0.0166136	0.00332753	9.3e-07	449734	-0.0170297	0.00435622	0.00012	254591
117	87513775	88253916	Yes	rs4269995	5	87701223	T	C	0.251	0.002	0.2483	0.2525	697828	-0.0339	0.966668	-9.576	-9.137	1.008e-21	6.441e-20	--	45.2	1.825	1	0.1767	697828	TMEM161B---[]---MEF2C	-0.0469477	0.00691129	1.08758e-11	248094	-0.021271	0.00309061	5.9e-12	449734	-0.0212981	0.00404961	1.4e-07	254591
118	103947968	104082179	Yes	rs77960	5	103964585	A	G	0.3304	0.003	0.3282	0.3344	697828	0.0221	1.02235	6.808	6.495	9.923e-12	8.29e-11	++	72.2	3.603	1	0.05769	697828	[]	0.0160774	0.00634132	0.0112342	248094	0.0187567	0.00286325	4.2e-11	449734	0.0156233	0.00375223	4.8e-05	254591
119	106311876	106657285	Yes	rs1559253	5	106657015	A	G	0.3588	0.0018	0.3575	0.3613	697828	0.0217	1.02194	6.112	5.832	9.819e-10	5.482e-09	++	85.1	6.702	1	0.009632	697828	[]--EFNA5	0.0359413	0.00628067	1.04805e-08	248094	0.00971162	0.00282129	0.00077	449734	0.00753307	0.00368822	0.043	254591
120	115904410	115939896	Yes	rs17140201	5	115939896	A	G	0.172	0.0025	0.1686	0.1739	697828	-0.0285	0.971902	-6.006	-5.731	1.9e-09	1.001e-08	--	0	0.626	1	0.4288	697828	SEMA6A--[]	-0.0236699	0.00803557	0.00322002	248094	-0.0193877	0.00362764	1.2e-07	449734	-0.0252388	0.00474168	1.5e-07	254591
121	122985763	123078348	Yes	rs13172141	5	122990902	A	T	0.5694	0.0048	0.5659	0.5759	697828	0.0217	1.02194	6.302	6.013	2.938e-10	1.823e-09	++	1	1.01	1	0.3148	697828	CSNK1G3--[]---ZNF608	0.0276045	0.00604803	5.00652e-06	248094	0.0121655	0.00271044	8.2e-06	449734	0.0128703	0.00354754	0.00024	254591
122	151500329	152610561	Yes	rs67988891	5	152204741	C	G	0.6821	0.0012	0.6812	0.6837	697828	-0.0363	0.964351	-9.202	-8.78	3.502e-20	1.633e-18	--	0	0.64	1	0.4236	697828	NMUR2---[]---GRIA1	-0.0309802	0.00639481	1.26854e-06	248094	-0.0232401	0.00288939	3.7e-15	449734	-0.0212178	0.00377885	2.3e-08	254591
123	163224992	163335429	Yes	rs2901796	5	163330708	A	G	0.3983	0.0027	0.3963	0.402	697828	0.0246	1.02491	6.487	6.189	8.785e-11	6.06e-10	++	0	0.17	1	0.68	697828	MAT2B---[]	0.0257907	0.00614257	2.6836e-05	248094	0.0134961	0.00275148	7e-07	449734	0.012847	0.00359706	0.0004	254591
124	166122541	166408788	Yes	rs42210	5	166408788	C	G	0.7124	0.0013	0.7114	0.7142	697828	-0.0291	0.971319	-6.521	-6.222	6.967e-11	4.905e-10	--	0	0.896	1	0.3438	697828	[]---TENM2	-0.0308774	0.00664264	3.3449e-06	248094	-0.0136991	0.0029834	3e-06	449734	-0.0148172	0.00390146	0.00015	254591
125	173539588	173555382	Yes	rs12518401	5	173539588	A	G	0.3844	0.0053	0.3773	0.3884	697828	-0.0236	0.976676	-6.705	-6.398	2.008e-11	1.577e-10	--	55.1	2.225	1	0.1358	697828	HMP19-[]---MSX2	-0.0336763	0.00648225	2.04025e-07	248094	-0.0125327	0.00284697	7e-06	449734	-0.0103075	0.00372486	0.0076	254591
126	175339984	175339984	Yes	rs7735794	5	175339984	A	G	0.2241	0	0.2241	0.2241	449734	0.0344	1.035	5.857	5.589	4.7e-09	2.288e-08	+?	0	0	0	1	449734	CPLX2--[]--THOC3	-	-	-	-	0.0201147	0.00340433	4.7e-09	449734	0.0217432	0.0044472	1.1e-06	254591
127	176852186	176908731	Yes	rs465670	5	176877624	T	C	0.5404	0.004	0.5349	0.5434	697828	0.0241	1.02439	6.616	6.313	3.684e-11	2.743e-10	++	0	0.027	1	0.8687	697828	[PRR7]	0.0227366	0.0059643	0.000137716	248094	0.0145107	0.00269725	6.3e-08	449734	0.014638	0.00352685	4.2e-05	254591
128	11501909	11579729	Yes	rs9394154	6	11574374	C	G	0.436	0.0075	0.4305	0.4461	697828	-0.0217	0.978534	-6.433	-6.138	1.248e-10	8.348e-10	--	0	0.765	1	0.3819	697828	[TMEM170B]	-0.0189087	0.00603371	0.00172477	248094	-0.0155027	0.00271526	1.3e-08	449734	-0.0134631	0.00355326	0.00012	254591
129	12118372	12155114	Yes	rs34125199	6	12155114	D	I	0.3497	0	0.3497	0.3497	248094	0.0370933	1.03779	5.948	5.676	2.706e-09	1.382e-08	?+	0	0	0	1	248094	[HIVEP1]	0.0370933	0.00623601	2.70626e-09	248094	-	-	-	-	-	-	-	-
130	12950751	13209144	Yes	rs9381812	6	13183998	A	G	0.7051	0.0009	0.7044	0.7063	697828	-0.0495	0.951705	-12.675	-12.093	8.154e-37	1.147e-33	--	93.5	15.373	1	8.822e-05	697828	[PHACTR1]	-0.0700076	0.00654076	9.62896e-27	248094	-0.023054	0.00294635	4.6e-15	449734	-0.0234586	0.00385042	8.3e-10	254591
131	14814367	14918945	Yes	rs1811899	6	14878060	T	C	0.7895	0.0006	0.7888	0.7899	697828	-0.0298	0.97064	-6.357	-6.065	2.063e-10	1.32e-09	--	64.1	2.788	1	0.095	697828	CD83---[]---JARID2	-0.0371925	0.0072493	2.88983e-07	248094	-0.0138364	0.00331758	4e-05	449734	-0.0148666	0.00435049	0.00065	254591
132	19054397	19128940	Yes	rs9465253	6	19102247	T	C	0.2801	0.0012	0.2792	0.2817	697828	0.023	1.02327	6.217	5.932	5.069e-10	2.999e-09	++	0	0.077	1	0.7808	697828	RNF144B---[]---ID4	0.0260855	0.006637	8.48404e-05	248094	0.0143932	0.00300229	1.4e-06	449734	0.0103355	0.00392768	0.0056	254591
133	26307651	26338257	Yes	rs766406	6	26319588	T	G	0.6409	0.0095	0.6339	0.6536	697828	-0.0236	0.976676	-6.463	-6.167	1.026e-10	6.982e-10	--	75.9	4.156	1	0.04148	697828	HIST1H4H--[]--BTN3A2	-0.0343357	0.00625399	4.01184e-08	248094	-0.0114777	0.00278612	7.1e-05	449734	-0.00965675	0.0036458	0.0088	254591
134	31836827	32134656	Yes	rs486416	6	31856070	A	G	0.6527	0.0261	0.6333	0.6879	697828	-0.0201	0.980101	-6.348	-6.057	2.18e-10	1.389e-09	--	0	0.68	1	0.4097	697828	[EHMT2]	-0.0202025	0.00646832	0.00178846	248094	-0.0154284	0.00277852	2.3e-08	449734	-0.0105225	0.00363329	0.0041	254591
135	37609457	37632234	Yes	rs13203140	6	37630133	T	C	0.6353	0.0079	0.6246	0.6412	697828	-0.0252	0.975115	-6.323	-6.033	2.561e-10	1.608e-09	--	23.1	1.3	1	0.2543	697828	[MDGA1]	-0.0291344	0.00621816	2.79346e-06	248094	-0.012827	0.00279966	1.1e-05	449734	-0.0125907	0.00365616	0.00061	254591
136	38440970	38440970	Yes	rs3923809	6	38440970	A	G	0.6947	0.0034	0.6902	0.6972	697828	-0.022	0.97824	-5.802	-5.536	6.545e-09	3.095e-08	--	43.1	1.758	1	0.1849	697828	[BTBD9]	-0.0291144	0.00643553	6.06799e-06	248094	-0.0114287	0.00292127	0.00011	449734	-0.00930421	0.00382363	0.016	254591
137	41517457	41570350	Yes	rs12206814	6	41517457	C	G	0.4869	0.0051	0.48	0.4907	697828	0.0254	1.02573	5.978	5.703	2.262e-09	1.174e-08	++	37.6	1.601	1	0.2057	697828	[FOXP4]	0.01707	0.00669839	0.010822	248094	0.015175	0.00273257	2.8e-08	449734	0.0160245	0.00357191	5.8e-06	254591
138	43350753	43364494	Yes	rs2396004	6	43355851	A	G	0.4354	0.0033	0.433	0.4399	697828	0.0214	1.02163	6.215	5.93	5.143e-10	3.038e-09	++	0	0.434	1	0.5101	697828	ZNF318--[]--ABCC10	0.0253443	0.00598555	2.29196e-05	248094	0.0124725	0.00270757	4.3e-06	449734	0.00828914	0.00354026	0.028	254591
139	50788778	51147806	Yes	rs3857599	6	50938247	A	C	0.1659	0.0039	0.163	0.1712	697828	0.0322	1.03272	6.262	5.974	3.806e-10	2.309e-09	++	66.4	2.976	1	0.08453	697828	TFAP2B---[]---PKHD1	0.0189654	0.00807422	0.018833	248094	0.0218522	0.00363894	1.4e-09	449734	0.0242614	0.00476419	3.2e-07	254591
140	54293261	56053000	No	rs2653349	6	55142337	A	G	0.2073	0.0098	0.1941	0.2146	697828	0.0659	1.06812	15.31	14.607	6.575e-53	2.523e-48	++	0	0.745	1	0.3879	697828	[HCRTR2]	0.0738083	0.00751586	9.0815e-23	248094	0.0387249	0.00327448	5.2e-32	449734	0.0414859	0.00428294	7e-22	254591
141	57749349	57975391	Yes	rs9476310	6	57767576	T	C	0.5104	0.0003	0.51	0.5106	697828	0.0263	1.02665	7.51	7.166	5.896e-14	7.736e-13	++	16	1.19	1	0.2753	697828	PRIM2---[]---GUSBP4	0.0320636	0.00598914	8.60524e-08	248094	0.0146494	0.00269436	7.5e-08	449734	0.0147177	0.00352479	3.4e-05	254591
142	62040035	62938037	Yes	rs1931814	6	62589167	A	G	0.4787	0.0009	0.4781	0.4799	697828	0.0264	1.02675	7.646	7.295	2.077e-14	2.988e-13	++	0	0.668	1	0.4136	697828	[KHDRBS2]	0.0310923	0.00596217	1.8363e-07	248094	0.0153877	0.00268976	1.6e-08	449734	0.0136212	0.00351784	0.00012	254591
143	72451438	72513915	Yes	rs2881955	6	72479263	T	C	0.2788	0.0001	0.2788	0.279	697828	0.0271	1.02747	6.88	6.564	5.988e-12	5.23e-11	++	0	0.006	1	0.9397	697828	OGFRL1---[]---RIMS1	0.0275919	0.00662793	3.14191e-05	248094	0.0161216	0.00300229	4.3e-08	449734	0.0195604	0.00392929	5.2e-07	254591
144	98549801	98797708	Yes	rs12195792	6	98705295	A	T	0.2717	0.0047	0.2683	0.278	697828	0.034	1.03458	8.209	7.832	2.236e-16	4.801e-15	++	86.5	7.382	1	0.006588	697828	MMS22L---[]---POU3F2	0.0471316	0.00666137	1.4873e-12	248094	0.0148997	0.00303318	6.7e-07	449734	0.017736	0.00395931	5.1e-06	254591
145	99574801	99660092	Yes	rs11154718	6	99592404	T	C	0.43	0.0033	0.4275	0.4344	697828	-0.0233	0.976969	-6.346	-6.055	2.203e-10	1.402e-09	--	0	0.886	1	0.3465	697828	FBXL4---[]---FAXC	-0.0273784	0.0060309	5.62679e-06	248094	-0.0121347	0.00272294	5.8e-06	449734	-0.0133731	0.00356283	0.00018	254591
146	110205285	110244765	Yes	rs60616179	6	110244765	A	G	0.9443	0.0011	0.9428	0.9451	697828	0.0509	1.05222	6.593	6.291	4.308e-11	3.164e-10	++	73.6	3.783	1	0.05179	697828	FIG4--[]--GPR6	0.0312123	0.0131726	0.0177963	248094	0.0375809	0.00594669	1.1e-10	449734	0.0379179	0.00778031	8.6e-07	254591
147	115699280	115699280	Yes	rs4535583	6	115699280	T	C	0.6991	0.0043	0.6959	0.7048	697828	0.0212	1.02143	5.77	5.505	7.919e-09	3.683e-08	++	0	0.757	1	0.3841	697828	[]---FRK	0.0271308	0.00655522	3.48548e-05	248094	0.0122035	0.00291927	3.9e-05	449734	0.00899148	0.00381778	0.018	254591
148	143751625	143825104	Yes	rs9496623	6	143751625	A	G	0.7328	0.0071	0.7232	0.7381	697828	-0.0235	0.976774	-5.838	-5.57	5.274e-09	2.542e-08	--	0	0.004	1	0.949	697828	[ADAT2]	-0.0234006	0.00682285	0.000604194	248094	-0.0151663	0.00316234	2.3e-06	449734	-0.0190919	0.0041409	6.4e-06	254591
149	147894399	147976721	Yes	rs2050185	6	147936781	A	G	0.6245	0.004	0.6191	0.6275	697828	0.0217	1.02194	6.079	5.8	1.207e-09	6.618e-09	++	0	0.614	1	0.4331	697828	SAMD5--[]---SASH1	0.0183511	0.00612633	0.00273934	248094	0.0149245	0.00279246	8.9e-08	449734	0.0175963	0.00365616	1.5e-06	254591
150	153095707	153574103	No	rs9479402	6	153135339	T	C	0.9883	0.0016	0.9862	0.9895	697828	-0.2186	0.803643	-12.566	-11.989	3.261e-36	4.054e-33	--	90.4	10.392	1	0.001266	697828	VIP--[]---FBXO5	-0.271876	0.02704	6.75461e-24	248094	-0.106941	0.0131937	3.2e-16	449734	-0.104143	0.0170642	9.9e-10	254591
151	165063209	165316353	Yes	rs9347926	6	165195547	A	T	0.4407	0.0077	0.4303	0.4465	697828	0.0264	1.02675	7.765	7.409	8.158e-15	1.275e-13	++	0	0.569	1	0.4505	697828	[]---C6orf118	0.0315807	0.00603199	1.64331e-07	248094	0.0157068	0.00269893	7.3e-09	449734	0.0134022	0.00352478	0.00015	254591
152	166261747	166263488	Yes	rs9348050	6	166263488	T	C	0.4864	0.0041	0.4809	0.4895	697828	0.0221	1.02235	6.835	6.522	8.187e-12	6.957e-11	++	20.3	1.255	1	0.2627	697828	PDE10A---[]--LINC00473	0.0188698	0.00594089	0.00149157	248094	0.016638	0.00269048	7.5e-10	449734	0.0180665	0.0035193	1.7e-07	254591
153	14093914	14111193	Yes	rs4027217	7	14093914	A	C	0.217	0.0073	0.2116	0.2268	697828	-0.0258	0.97453	-5.735	-5.472	9.764e-09	4.459e-08	--	0	0.013	1	0.9106	697828	ETV1--[]--DGKB	-0.0238455	0.007163	0.000870923	248094	-0.0150359	0.00328423	3e-06	449734	-0.0134734	0.00429609	0.00096	254591
154	24006441	24118425	Yes	rs10237162	7	24085405	T	C	0.7232	0.0031	0.719	0.7255	697828	0.0368	1.03749	9.187	8.765	4.039e-20	1.86e-18	++	83.5	6.07	1	0.01375	697828	STK31---[]---NPY	0.0494502	0.00663397	8.93754e-14	248094	0.0176177	0.00301354	3.5e-09	449734	0.0213128	0.00393743	4.2e-08	254591
155	32255608	33138472	Yes	rs10951325	7	32265545	T	C	0.6319	0.0019	0.6305	0.6344	697828	0.0336	1.03417	9.554	9.116	1.244e-21	7.802e-20	++	0	0.11	1	0.7396	697828	[PDE1C]	0.0369558	0.00619759	2.4657e-09	248094	0.0205969	0.00280238	7.9e-14	449734	0.022672	0.00366923	2.8e-10	254591
156	50454452	50806160	Yes	rs6967481	7	50642701	T	C	0.5011	0.0062	0.4966	0.5094	697828	0.0321	1.03262	9.804	9.355	1.077e-22	8.393e-21	++	0	0.02	1	0.8871	697828	DDC--[]--GRB10	0.0358656	0.00601817	2.52237e-09	248094	0.0206433	0.00269925	6.9e-15	449734	0.0229371	0.00353403	5.4e-11	254591
157	69869513	70042155	Yes	rs4236237	7	69936477	A	C	0.5992	0.0022	0.5976	0.6021	697828	-0.0242	0.97609	-6.772	-6.461	1.27e-11	1.038e-10	--	37.1	1.589	1	0.2075	697828	[AUTS2]	-0.03077	0.00609347	4.42163e-07	248094	-0.0128383	0.00273991	2.8e-06	449734	-0.0129154	0.0035795	0.00033	254591
158	71580762	71835456	Yes	rs2944831	7	71779635	A	G	0.2946	0.005	0.2878	0.2984	697828	0.025	1.02532	6.804	6.491	1.02e-11	8.501e-11	++	0	0.18	1	0.6717	697828	[CALN1]	0.0246811	0.00664089	0.000202002	248094	0.0172414	0.00295094	1.1e-08	449734	0.0145947	0.00385928	0.00019	254591
159	77801101	77823771	Yes	rs3807651	7	77823771	A	T	0.4938	0.0036	0.4911	0.4986	697828	0.0246	1.02491	6.03	5.753	1.643e-09	8.768e-09	++	0	0.001	1	0.9792	697828	[MAGI2]	0.0220346	0.0060936	0.000299048	248094	0.0129103	0.00269908	1.4e-06	449734	0.0163971	0.0035313	2.3e-06	254591
160	96143471	96560721	No	rs10254050	7	96468077	C	G	0.1905	0.005	0.1868	0.1972	697828	-0.0577	0.943933	-11.751	-11.211	7.01e-32	3.584e-29	--	93.4	15.243	1	9.451e-05	697828	SHFM1---[]---DLX6	-0.0761045	0.00750847	3.64398e-24	248094	-0.0246317	0.00344351	1.2e-12	449734	-0.0192316	0.00450242	1.6e-05	254591
161	101635248	103192262	No	rs4729854	7	102383663	A	T	0.4701	0.0179	0.446	0.4834	697828	-0.0485	0.952657	-13.147	-12.544	1.761e-39	4.281e-36	--	0	0.093	1	0.7603	697828	AK301666--[]-FAM185A	-0.0560221	0.0069309	6.25823e-16	248094	-0.0287186	0.00275036	3.3e-25	449734	-0.0295214	0.00359467	3e-16	254591
162	113863384	114508802	Yes	rs2396719	7	113893884	A	G	0.239	0.0116	0.2234	0.2477	697828	0.0331	1.03365	7.47	7.127	8.04e-14	1.027e-12	++	0	0.995	1	0.3184	697828	PPP1R3A---[]---FOXP2	0.0378571	0.00720437	1.48227e-07	248094	0.0170398	0.00312251	6.6e-08	449734	0.0180677	0.00408757	1e-05	254591
163	115673079	115809732	Yes	rs17302081	7	115673079	T	C	0.4414	0.0008	0.4409	0.4424	697828	0.022	1.02224	6.041	5.764	1.529e-09	8.211e-09	++	60.1	2.504	1	0.1136	697828	TFEC-[]---TES	0.0139989	0.0060034	0.0197084	248094	0.0156573	0.00270471	6.9e-09	449734	0.0147194	0.00353712	2.2e-05	254591
164	121942674	121950965	Yes	rs6968240	7	121942674	A	C	0.4171	0.0159	0.3957	0.4289	697828	0.0216	1.02183	6.622	6.318	3.539e-11	2.644e-10	++	66.4	2.972	1	0.08472	697828	[FEZF1]	0.0331152	0.00621032	9.68605e-08	248094	0.0118108	0.00272987	1.8e-05	449734	0.0169101	0.00357053	2.8e-06	254591
165	132288756	132298372	Yes	rs62465218	7	132294312	A	C	0.1456	0.0043	0.1399	0.1488	697828	-0.0274	0.972972	-6.011	-5.735	1.843e-09	9.737e-09	--	33.2	1.497	1	0.2212	697828	PLXNA4--[]---CHCHD3	-0.0393848	0.00862686	4.96558e-06	248094	-0.0152417	0.00377821	4.2e-05	449734	-0.0161054	0.00494595	0.0011	254591
166	133321915	133734597	Yes	rs6958557	7	133585794	T	G	0.6067	0.0007	0.6058	0.6072	697828	0.0261	1.02644	7.269	6.936	3.616e-13	4.044e-12	++	67.7	3.098	1	0.07838	697828	[EXOC4]	0.0349816	0.0060872	9.06465e-09	248094	0.0127113	0.00275105	1.7e-06	449734	0.0167896	0.00359731	2.5e-06	254591
167	148564367	148564367	Yes	rs113161209	7	148564367	A	G	0.077	0.0083	0.0708	0.0882	697828	0.0442	1.04519	5.777	5.512	7.594e-09	3.545e-08	++	0	0.007	1	0.9317	697828	[EZH2]	0.0392528	0.0111715	0.00044229	248094	0.02455	0.00531193	4.5e-06	449734	0.0281809	0.00692802	5.4e-05	254591
168	150647969	150647969	Yes	rs2072413	7	150647969	T	C	0.2624	0.0119	0.2464	0.2713	697828	-0.0208	0.979415	-5.714	-5.452	1.105e-08	4.992e-08	--	0	0.008	1	0.9304	697828	[KCNH2]	-0.024058	0.00721068	0.000847795	248094	-0.0141904	0.00303599	3.5e-06	449734	-0.0168624	0.003974	3.3e-05	254591
169	3644885	3671918	Yes	rs62479736	8	3654320	T	G	0.2915	0.0027	0.2878	0.2935	697828	0.0243	1.0246	6.551	6.25	5.727e-11	4.102e-10	++	0	0.003	1	0.9537	697828	[CSMD1]	0.0255662	0.00662461	0.000113724	248094	0.0151972	0.00295184	1.2e-07	449734	0.0180027	0.00385971	2e-06	254591
170	4777391	4868053	Yes	rs35524253	8	4823608	A	G	0.3539	0.0044	0.348	0.3572	697828	0.0342	1.03479	9.123	8.704	7.302e-20	3.191e-18	++	84.2	6.342	1	0.01179	697828	[CSMD1]	0.046804	0.00627334	8.56569e-14	248094	0.015862	0.00281259	5.8e-09	449734	0.018291	0.00368068	4.5e-07	254591
171	8092025	11868062	Yes	rs2979139	8	8268313	A	G	0.5048	0.0004	0.5043	0.5051	697828	-0.0267	0.973653	-7.928	-7.564	2.235e-15	3.915e-14	--	0	0.12	1	0.7286	697828	SGK223--[]---CLDN23	-0.0299018	0.00597419	5.5739e-07	248094	-0.0168003	0.00269315	7.4e-10	449734	-0.0188957	0.00352641	1.4e-07	254591
172	27152497	27184695	Yes	rs2322605	8	27164449	A	G	0.4684	0.0155	0.4476	0.4799	697828	-0.0215	0.978729	-6.253	-5.966	4.025e-10	2.43e-09	--	0	0.273	1	0.601	697828	[TRIM35]	-0.0250428	0.00603725	3.35062e-05	248094	-0.0125841	0.00268932	2.5e-06	449734	-0.0151434	0.00351413	1.7e-05	254591
173	31498376	32087606	Yes	rs71523448	8	31817493	C	G	0.0788	0.0006	0.078	0.0793	697828	-0.0499	0.951325	-7.732	-7.377	1.059e-14	1.617e-13	--	0	0.996	1	0.3182	697828	WRN---[]---NRG1	-0.0626501	0.011582	6.24851e-08	248094	-0.0280253	0.00505523	2e-08	449734	-0.0346061	0.00663132	1.8e-07	254591
174	33542927	34250939	Yes	rs6993892	8	33729200	T	C	0.6162	0.0098	0.6089	0.6294	697828	-0.0347	0.965895	-9.599	-9.159	8.039e-22	5.241e-20	--	0	0.165	1	0.6843	697828	DUSP26---[]	-0.0373556	0.00617455	1.44685e-09	248094	-0.0205162	0.00275662	8.4e-14	449734	-0.0159546	0.00360184	8.5e-06	254591
175	35195079	35237788	Yes	rs6468316	8	35237788	T	C	0.4708	0.0069	0.4615	0.476	697828	-0.0197	0.980493	-5.811	-5.544	6.223e-09	2.956e-08	--	38	1.612	1	0.2042	697828	[UNC5D]	-0.0147338	0.00602528	0.0144706	248094	-0.0148192	0.00268825	5.9e-08	449734	-0.0133781	0.0035109	0.00017	254591
176	53111809	53246838	Yes	rs7845620	8	53129069	A	C	0.8344	0.0011	0.8329	0.8353	697828	-0.0425	0.95839	-9.285	-8.859	1.619e-20	8.086e-19	--	76.9	4.331	1	0.03742	697828	[ST18]	-0.057751	0.00801343	5.72436e-13	248094	-0.0224873	0.00363166	5.2e-10	449734	-0.0220262	0.00474997	2.9e-06	254591
177	59799367	59817473	Yes	rs10109566	8	59800446	A	G	0.4849	0.0088	0.473	0.4914	697828	-0.0222	0.978045	-6.032	-5.755	1.618e-09	8.646e-09	--	0	0.003	1	0.9582	697828	[TOX]	-0.0218118	0.00599444	0.000273903	248094	-0.0131119	0.00270003	1.5e-06	449734	-0.0122606	0.00353129	0.00048	254591
178	64804804	65035026	Yes	rs34054660	8	65015659	A	G	0.5747	0.0009	0.5741	0.5759	697828	0.0249	1.02521	5.734	5.471	9.819e-09	4.482e-08	++	85	6.682	1	0.009741	697828	YTHDF3---[]---BHLHE22	0.0331697	0.00603797	3.92985e-08	248094	0.00873038	0.00271775	0.0022	449734	0.0106071	0.0035579	0.0052	254591
179	73426274	73479723	Yes	rs187028	8	73459513	A	T	0.3146	0.0027	0.311	0.3166	697828	-0.0222	0.978045	-6.655	-6.35	2.826e-11	2.154e-10	--	0	0.143	1	0.7052	697828	[KCNB2]	-0.0275535	0.0064503	1.93681e-05	248094	-0.0151215	0.00289662	3.1e-07	449734	-0.015708	0.00378228	5.7e-05	254591
180	76569119	76721432	Yes	rs16939162	8	76653156	A	G	0.8304	0.0002	0.8303	0.8307	697828	0.038	1.03873	8.084	7.713	6.258e-16	1.227e-14	++	0	0.794	1	0.3729	697828	HNF4G---[]---ZFHX4	0.0325836	0.00793856	4.04319e-05	248094	0.0249887	0.00358356	2.2e-12	449734	0.0240178	0.00469811	2.7e-07	254591
181	91475724	91545387	Yes	rs6988733	8	91535686	T	C	0.3491	0.0026	0.3472	0.3526	697828	0.0229	1.02316	5.821	5.554	5.84e-09	2.79e-08	++	0	0.469	1	0.4934	697828	CALB1---[]--TMEM64	0.0251919	0.00626546	5.79968e-05	248094	0.0121491	0.00282228	2e-05	449734	0.0115277	0.00369373	0.0017	254591
182	93267443	93368824	Yes	rs7006885	8	93283578	A	G	0.2878	0.0018	0.2854	0.2891	697828	0.0301	1.03056	7.152	6.824	8.557e-13	8.87e-12	++	94	16.659	1	4.475e-05	697828	RUNX1T1---[]---TRIQK	0.0501248	0.00664733	4.66472e-14	248094	0.0100207	0.00297063	0.00094	449734	0.00923483	0.00388645	0.016	254591
183	101934140	101998674	Yes	rs3100052	8	101967139	A	G	0.3886	0.0017	0.3874	0.3908	697828	0.0246	1.02491	6.978	6.658	2.987e-12	2.773e-11	++	0	0.902	1	0.3423	697828	YWHAZ-[]---ZNF706	0.0207238	0.00609793	0.000677483	248094	0.0170795	0.00276058	6.9e-10	449734	0.0133216	0.00361385	0.00027	254591
184	116439639	116869477	Yes	rs2737245	8	116658583	T	G	0.2748	0.0083	0.2636	0.2809	697828	0.0335	1.03407	8.866	8.46	7.556e-19	2.684e-17	++	0	0.042	1	0.8382	697828	[TRPS1]	0.0347101	0.00677573	3.01113e-07	248094	0.0215069	0.00300138	4.5e-13	449734	0.0181246	0.0039293	3.8e-06	254591
185	135590510	136227957	Yes	rs1871729	8	136223702	A	G	0.6816	0.002	0.6789	0.6831	697828	-0.0232	0.977067	-6.051	-5.774	1.437e-09	7.759e-09	--	0	0.386	1	0.5347	697828	ZFAT---[]---KHDRBS3	-0.0262003	0.00638014	4.01607e-05	248094	-0.0125518	0.00288364	7.2e-06	449734	-0.0145115	0.00377423	5.4e-05	254591
186	8379838	8456247	Yes	rs6477309	9	8450638	T	C	0.6661	0.0009	0.6654	0.6673	697828	0.0309	1.03138	8.213	7.836	2.155e-16	4.642e-15	++	0	0.566	1	0.4519	697828	[PTPRD]	0.0347817	0.0063235	3.77596e-08	248094	0.0174399	0.00286276	8e-10	449734	0.0138994	0.00373805	0.00017	254591
187	24524268	24673321	Yes	rs2844016	9	24582747	T	C	0.2935	0.0082	0.2826	0.2996	697828	0.0266	1.02696	6.254	5.967	3.991e-10	2.411e-09	++	18.6	1.228	1	0.2677	697828	IZUMO3--[]	0.0306512	0.00663587	3.85553e-06	248094	0.0131708	0.00294187	1.3e-05	449734	0.0135556	0.00384535	0.00039	254591
188	36901161	37378782	Yes	rs308521	9	37367094	T	C	0.6039	0.0017	0.6026	0.6061	697828	0.0283	1.0287	8.828	8.423	1.064e-18	3.667e-17	++	0	0.09	1	0.7641	697828	ZCCHC7-[]--GRHPR	0.0306808	0.0061087	5.08907e-07	248094	0.0199718	0.00275427	3.7e-13	449734	0.0166975	0.00359737	2.2e-06	254591
189	38010085	38010085	Yes	rs4878734	9	38010085	A	T	0.5114	0.0091	0.4992	0.5181	697828	0.0218	1.02204	5.725	5.463	1.032e-08	4.69e-08	++	0	0.669	1	0.4136	697828	[SHB]	0.0164292	0.00595836	0.0058266	248094	0.0138947	0.00268872	3.7e-07	449734	0.0135554	0.00351521	0.00012	254591
190	74244387	74245426	Yes	rs6560218	9	74245426	T	C	0.5183	0.0023	0.5165	0.5214	697828	-0.0224	0.977849	-5.948	-5.675	2.716e-09	1.387e-08	--	0	0.012	1	0.9134	697828	TRPM3---[]--TMEM2	-0.0208618	0.006031	0.000541846	248094	-0.012825	0.00271548	1.3e-06	449734	-0.010667	0.00355295	0.0025	254591
191	76232839	76913342	Yes	rs62553781	9	76679777	T	C	0.0329	0.0026	0.0293	0.0348	697828	-0.0689	0.93342	-7.462	-7.12	8.491e-14	1.079e-12	--	42.9	1.753	1	0.1855	697828	ANXA1---[]---RORB	-0.0596888	0.0176317	0.000707301	248094	-0.0504004	0.00734656	1.2e-11	449734	-0.0522963	0.00962701	9.1e-08	254591
192	83181144	83525879	Yes	rs12378543	9	83196097	T	C	0.3841	0.0023	0.381	0.3858	697828	-0.0233	0.976969	-6.137	-5.855	8.428e-10	4.768e-09	--	0	0.006	1	0.9381	697828	TLE4---[]	-0.022179	0.00616687	0.000322317	248094	-0.0134741	0.00276985	6.6e-07	449734	-0.0178715	0.00362212	5e-07	254591
193	85175417	85355480	Yes	rs555784	9	85318704	A	T	0.3803	0.0046	0.3742	0.3837	697828	-0.0249	0.975407	-6.592	-6.29	4.325e-11	3.175e-10	--	0	0.754	1	0.3852	697828	SPATA31D1---[]---RASEF	-0.0285544	0.00617055	3.69381e-06	248094	-0.0130339	0.00276767	1.8e-06	449734	-0.0118669	0.00362111	0.00091	254591
194	86368660	86639999	Yes	rs295268	9	86429305	T	C	0.7403	0.0055	0.7329	0.7443	697828	-0.0308	0.969669	-6.702	-6.395	2.054e-11	1.61e-10	--	0	0.032	1	0.8588	697828	[GKAP1]	-0.0261655	0.00679011	0.000116474	248094	-0.0165883	0.00307939	4.1e-08	449734	-0.0140301	0.00403066	0.0003	254591
195	92178472	92225483	Yes	rs3138490	9	92219000	A	T	0.515	0.0034	0.5104	0.5175	697828	0.0235	1.02378	6.463	6.167	1.026e-10	6.982e-10	++	0	0.001	1	0.9727	697828	SEMA4D---[]GADD45G	0.0227702	0.00595141	0.000130167	248094	0.0138912	0.00271195	1.9e-07	449734	0.0186589	0.00354809	1e-07	254591
196	109802359	109806199	Yes	rs10759208	9	109806199	T	C	0.6138	0.007	0.6086	0.6233	697828	-0.0248	0.975505	-6.538	-6.238	6.222e-11	4.424e-10	--	0	0.187	1	0.6656	697828	ZNF462--[]---RAD23B	-0.0262045	0.00617241	2.18123e-05	248094	-0.0132332	0.00276525	6e-07	449734	-0.0120334	0.00361258	0.00059	254591
197	116761008	116808053	Yes	rs11788633	9	116767656	C	G	0.6547	0.0019	0.6533	0.6573	697828	0.0197	1.0199	6.067	5.789	1.3e-09	7.081e-09	++	39	1.639	1	0.2004	697828	[ZNF618]	0.0291567	0.00627681	3.39222e-06	248094	0.0116688	0.00282602	4e-05	449734	0.0132918	0.00369482	0.00035	254591
198	126290554	127092887	Yes	rs10818834	9	126317324	T	C	0.7297	0.0041	0.7242	0.7327	697828	0.0302	1.03066	7.246	6.913	4.295e-13	4.731e-12	++	0	0.216	1	0.642	697828	[DENND1A]	0.02629	0.00666093	7.90629e-05	248094	0.0188673	0.00304915	1.1e-09	449734	0.0223509	0.00399224	3.8e-08	254591
199	131867280	131977279	Yes	rs10988239	9	131943440	T	C	0.5117	0.0013	0.51	0.5127	697828	-0.0213	0.978925	-6.954	-6.635	3.56e-12	3.255e-11	--	73.4	3.76	1	0.05249	697828	IER5L-[]---C9orf106	-0.0159808	0.00617151	0.00961219	248094	-0.0186334	0.00273304	1.6e-11	449734	-0.0237713	0.0035718	3.5e-11	254591
200	139271190	139382594	Yes	rs12380242	9	139310187	T	C	0.5058	0.0054	0.5018	0.5131	697828	-0.0206	0.979611	-6.45	-6.154	1.117e-10	7.545e-10	--	51.4	2.06	1	0.1512	697828	[PMPCA]	-0.0161292	0.00598741	0.00706227	248094	-0.015796	0.0026864	1.6e-09	449734	-0.01072	0.00351273	0.002	254591
201	140240310	140581700	No	rs28458909	9	140257189	T	C	0.1225	0.0015	0.1204	0.1236	684659	-0.0702	0.932207	-12.691	-12.109	6.645e-37	9.519e-34	--	0	0.312	1	0.5766	684659	[EXD3]	-0.0719023	0.0103038	2.92336e-12	234925	-0.0432803	0.00407749	2.6e-26	449734	-0.0410218	0.00536411	2e-14	254591
202	768518	804315	Yes	rs497338	10	804315	T	C	0.2881	0.0094	0.2811	0.3008	697828	0.0271	1.02747	6.675	6.368	2.477e-11	1.91e-10	++	0	0.437	1	0.5085	697828	DIP2C--[]--LARP4B	0.0292165	0.00647718	6.46119e-06	248094	0.0149321	0.00298801	6.9e-07	449734	0.015244	0.00390732	9.4e-05	254591
203	56694222	56703883	Yes	rs66617308	10	56699338	T	C	0.6713	0.0013	0.6703	0.6731	697828	0.0184	1.01857	5.737	5.474	9.621e-09	4.4e-08	++	0	0.906	1	0.3413	697828	PCDH15---[]---MTRNR2L5	0.0168996	0.00636089	0.00788619	248094	0.0144176	0.00286063	2.3e-07	449734	0.0175112	0.00373956	1.7e-06	254591
204	60556854	60597789	Yes	rs9416744	10	60567937	A	C	0.2595	0.0052	0.2556	0.2664	697828	0.0344	1.035	8.742	8.341	2.29e-18	7.375e-17	++	60.7	2.542	1	0.1109	697828	[BICC1]	0.0443273	0.00682764	8.44593e-11	248094	0.0189843	0.00308075	1.3e-09	449734	0.0126073	0.00402095	0.0017	254591
205	61789272	61794146	Yes	rs11597421	10	61794146	A	G	0.4973	0.0056	0.4898	0.5014	697828	-0.0238	0.976481	-5.903	-5.632	3.572e-09	1.781e-08	--	0	0.772	1	0.3795	697828	[ANK3]	-0.0261949	0.00620001	2.38759e-05	248094	-0.0119469	0.00273785	2.5e-05	449734	-0.00816185	0.00357847	0.025	254591
206	64301941	64317700	Yes	rs12249410	10	64301941	T	G	0.1077	0.003	0.1036	0.1099	697828	-0.0337	0.966862	-6.246	-5.959	4.22e-10	2.537e-09	--	0	0.435	1	0.5095	697828	[ZNF365]	-0.0312567	0.00978584	0.00140053	248094	-0.0236941	0.00438012	6.4e-08	449734	-0.0234449	0.00574566	6.3e-05	254591
207	69551141	69791938	Yes	rs17712705	10	69623271	A	G	0.3265	0.005	0.3197	0.3302	697828	-0.0247	0.975603	-6.192	-5.908	5.942e-10	3.466e-09	--	9.6	1.106	1	0.293	697828	DNAJC12--[]--SIRT1	-0.0290013	0.00639388	5.72736e-06	248094	-0.0125961	0.00286003	1.4e-05	449734	-0.0139001	0.00374463	0.00021	254591
208	70330580	70399109	Yes	rs2298117	10	70346740	T	C	0.448	0.0055	0.4406	0.452	697828	-0.0225	0.977751	-6.159	-5.877	7.311e-10	4.188e-09	--	0	0.712	1	0.3987	697828	[TET1]	-0.0180338	0.00602161	0.002745	248094	-0.0150867	0.00270147	5.1e-08	449734	-0.0151242	0.00352895	2.7e-05	254591
209	73039860	73045537	Yes	rs10762434	10	73044413	C	G	0.7752	0.0034	0.7707	0.7777	697828	0.0249	1.02521	5.865	5.596	4.499e-09	2.199e-08	++	49.7	1.988	1	0.1585	697828	[UNC5B]	0.0328885	0.00710601	3.67709e-06	248094	0.0123636	0.00323034	0.00011	449734	0.0165307	0.00423296	8.1e-05	254591
210	93011741	93043858	Yes	rs2648721	10	93026996	T	G	0.7039	0.003	0.7016	0.708	697828	-0.0238	0.976481	-5.861	-5.592	4.6e-09	2.244e-08	--	0	0.118	1	0.731	697828	[PCGF5]	-0.0211013	0.00655578	0.00128767	248094	-0.0146506	0.00293525	9.1e-07	449734	-0.013546	0.00383963	0.00067	254591
211	93819646	93988790	Yes	rs61875203	10	93888810	T	C	0.2773	0.0004	0.2769	0.2776	697828	0.0259	1.02624	6.289	6.001	3.19e-10	1.965e-09	++	0	0.177	1	0.6742	697828	[CPEB3]	0.0274338	0.00671165	4.36091e-05	248094	0.0145036	0.00300062	1.6e-06	449734	0.015988	0.00392258	5.2e-05	254591
212	104897985	104958244	Yes	rs1163238	10	104943993	A	G	0.3885	0.0088	0.3766	0.395	697828	-0.0237	0.976579	-5.782	-5.517	7.361e-09	3.446e-08	--	0	0.337	1	0.5618	697828	[NT5C2]	-0.0184319	0.00618105	0.00286259	248094	-0.0135424	0.00275048	6.1e-07	449734	-0.0132511	0.00359977	0.00024	254591
213	119145774	119145774	Yes	rs7900191	10	119145774	T	C	0.4035	0.0107	0.3956	0.4179	697828	-0.0187	0.981474	-5.72	-5.457	1.066e-08	4.831e-08	--	0	0.332	1	0.5645	697828	PDZD8--[]---EMX2	-0.0183077	0.00621035	0.00319825	248094	-0.0139306	0.00276251	8e-07	449734	-0.0103783	0.00361324	0.0049	254591
214	123536490	123558811	Yes	rs11200159	10	123553392	A	C	0.6551	0.0009	0.6545	0.6563	697828	-0.0234	0.976872	-6.161	-5.878	7.232e-10	4.147e-09	--	0	0.024	1	0.8771	697828	[ATE1]	-0.0225928	0.00636539	0.000386203	248094	-0.0141532	0.00283041	4.7e-07	449734	-0.010577	0.00369949	0.0037	254591
215	125425497	125427132	Yes	rs3808964	10	125426627	T	G	0.6326	0.0028	0.6288	0.6347	697828	0.02	1.0202	5.953	5.68	2.634e-09	1.349e-08	++	41.7	1.715	1	0.1903	697828	[GPR26]	0.0153706	0.00615319	0.0124872	248094	0.0157096	0.00279601	2.7e-08	449734	0.0174549	0.00365686	1.2e-06	254591
216	126710791	126733607	Yes	rs9664044	10	126710791	T	C	0.2319	0.0009	0.2307	0.2326	697828	-0.0268	0.973556	-6.286	-5.998	3.257e-10	2.003e-09	--	0	0.106	1	0.7446	697828	[CTBP2]	-0.0247954	0.00711241	0.000489335	248094	-0.0168501	0.00318672	1.6e-07	449734	-0.0166993	0.00417115	6e-05	254591
217	129304075	129304075	Yes	rs10830107	10	129304075	A	G	0.7922	0.0067	0.7832	0.7972	697828	0.0283	1.0287	6.144	5.862	8.066e-10	4.581e-09	++	0	0.555	1	0.4561	697828	DOCK1--[]--NPS	0.0308349	0.00723654	2.03067e-05	248094	0.014864	0.00339169	7.2e-06	449734	0.0100243	0.00443443	0.029	254591
218	131149976	131179572	Yes	rs76518095	10	131149976	T	C	0.0772	0.0011	0.0757	0.078	697828	0.0398	1.0406	6.05	5.772	1.449e-09	7.818e-09	++	0	0.184	1	0.6681	697828	[]---MGMT	0.0464091	0.0117439	7.76467e-05	248094	0.0237761	0.00505367	4.2e-06	449734	0.0248405	0.00662647	0.00019	254591
219	133736245	133761285	Yes	rs12771973	10	133749294	A	G	0.2475	0.0072	0.2379	0.2528	697828	-0.0223	0.977947	-5.868	-5.599	4.408e-09	2.158e-08	--	0	0.346	1	0.5563	697828	[PPP2R2D]	-0.0277495	0.00698842	7.15195e-05	248094	-0.0135612	0.00309542	1.3e-05	449734	-0.0151875	0.0040461	0.00024	254591
220	13291821	13348243	Yes	rs60521023	11	13314102	D	I	0.2965	0	0.2965	0.2965	248094	0.0429092	1.04384	6.53	6.23	6.577e-11	4.654e-10	?+	0	0	0	1	248094	[ARNTL]	0.0429092	0.00657133	6.57671e-11	248094	-	-	-	-	-	-	-	-
221	16408536	16933355	Yes	rs10832648	11	16618307	A	C	0.1989	0.0035	0.1963	0.2035	697828	-0.0314	0.969088	-7.179	-6.849	7.029e-13	7.413e-12	--	0	0.07	1	0.7912	697828	SOX6---[]---C11orf58	-0.0301417	0.00741046	4.743e-05	248094	-0.019805	0.00338271	3.2e-09	449734	-0.0207812	0.00442293	1.6e-06	254591
222	27506369	27730556	Yes	rs10742179	11	27650524	A	G	0.2627	0.0034	0.2602	0.2673	697828	0.0352	1.03583	8.255	7.876	1.519e-16	3.375e-15	++	0	0.955	1	0.3285	697828	LIN7C---[]--BDNF	0.0384619	0.00674002	1.15273e-08	248094	0.0182967	0.00306465	1.5e-09	449734	0.0192895	0.00400951	1.7e-06	254591
223	28379460	28577867	Yes	rs4923541	11	28479535	T	C	0.5104	0.0003	0.5102	0.5109	697828	0.0247	1.02501	6.488	6.191	8.685e-11	5.997e-10	++	9.4	1.104	1	0.2934	697828	METTL15---[]	0.0281947	0.00598375	2.45155e-06	248094	0.0124233	0.00268691	4.6e-06	449734	0.0147351	0.00351509	1.9e-05	254591
224	30166096	30489027	Yes	rs621421	11	30405914	T	C	0.6256	0.006	0.6211	0.6337	697828	-0.0273	0.973069	-8.008	-7.64	1.167e-15	2.165e-14	--	0	0.019	1	0.8912	697828	ARL14EP--[]--MPPED2	-0.0289344	0.00620267	3.08715e-06	248094	-0.0177395	0.00277678	7.5e-11	449734	-0.0125645	0.00363458	0.00042	254591
225	33735359	33831646	Yes	rs11032362	11	33759092	A	G	0.0937	0.0039	0.0908	0.0989	697828	0.0704	1.07294	11.424	10.9	3.166e-30	1.153e-27	++	41.5	1.71	1	0.191	697828	CD59--[]-FBXO3	0.079078	0.0100598	3.79226e-15	248094	0.0395538	0.00467579	4.8e-17	449734	0.0421219	0.00611377	2.3e-12	254591
226	43882764	43947777	Yes	rs7111582	11	43893222	A	G	0.8956	0	0.8956	0.8956	697828	-0.0388	0.961943	-7.921	-7.557	2.358e-15	4.111e-14	--	0	0.06	1	0.8067	697828	HSD17B12--[]-ALKBH3	-0.0478388	0.00972455	8.68296e-07	248094	-0.0277534	0.00442599	5.2e-10	449734	-0.0291677	0.00580423	7.3e-07	254591
227	46256156	47932121	Yes	rs10838687	11	47312892	T	G	0.7918	0.0022	0.7902	0.7948	697828	0.0345	1.0351	7.71	7.356	1.263e-14	1.899e-13	++	71.2	3.469	1	0.06255	697828	[MADD]	0.0448591	0.00736517	1.11508e-09	248094	0.0165822	0.00329533	3.8e-07	449734	0.0197916	0.00431131	5.5e-06	254591
228	57689210	58438307	Yes	rs12808544	11	58373221	A	C	0.2409	0.0014	0.2399	0.2428	697828	-0.0348	0.965799	-8.267	-7.888	1.372e-16	3.076e-15	--	0	0	1	0.9869	697828	[ZFP91]	-0.0342384	0.00696539	8.82457e-07	248094	-0.0207525	0.00314754	3e-11	449734	-0.025369	0.00411453	5.4e-10	254591
229	66064850	66673079	Yes	rs662094	11	66342691	A	G	0.4944	0.0018	0.4919	0.4958	697828	0.0282	1.0286	7.561	7.214	4.014e-14	5.449e-13	++	71.2	3.471	1	0.06244	697828	CTSF-[]--CCDC87	0.0357998	0.00596331	1.92767e-09	248094	0.0135756	0.00268945	7.1e-07	449734	0.0137077	0.00351749	0.00016	254591
230	82972097	83064227	Yes	rs1278402	11	82972097	A	G	0.736	0.0042	0.7329	0.7416	697828	0.0281	1.0285	6.255	5.968	3.964e-10	2.396e-09	++	81.6	5.424	1	0.01986	697828	ANKRD42--[]CCDC90B	0.0380147	0.00678994	2.1488e-08	248094	0.0110161	0.0030443	0.00028	449734	0.0109891	0.00397993	0.0069	254591
231	92706175	93009301	Yes	rs1508608	11	92893825	A	G	0.3199	0.0025	0.3166	0.3217	697828	0.028	1.0284	7.499	7.155	6.415e-14	8.355e-13	++	80.9	5.224	1	0.02227	697828	[SLC36A4]	0.0402209	0.00637802	2.85481e-10	248094	0.0133063	0.00287547	3.2e-06	449734	0.00781325	0.00376159	0.034	254591
232	95116704	95126181	Yes	rs4121878	11	95120372	C	G	0.5008	0.0089	0.4889	0.5074	697828	0.0219	1.02214	6.037	5.76	1.57e-09	8.412e-09	++	0	0.21	1	0.6469	697828	SESN3---[]---FAM76B	0.0238963	0.00602345	7.26795e-05	248094	0.0121092	0.00268747	4.8e-06	449734	0.00698623	0.00351448	0.054	254591
233	99152801	99152801	Yes	rs17577073	11	99152801	A	C	0.5636	0.0033	0.5592	0.566	697828	0.0246	1.02491	6.665	6.36	2.639e-11	2.023e-10	++	0	0.735	1	0.3912	697828	[CNTN5]	0.0279554	0.00599601	3.12202e-06	248094	0.0134248	0.0027333	1.3e-06	449734	0.0128218	0.00357759	0.0003	254591
234	113395329	113444727	Yes	rs2514214	11	113395329	A	G	0.2691	0.0021	0.2676	0.2719	697828	0.027	1.02737	6.288	5.999	3.217e-10	1.98e-09	++	0	0.008	1	0.9286	697828	DRD2--[]---TMPRSS5	0.025722	0.0067314	0.000132814	248094	0.0153022	0.00303738	5.9e-07	449734	0.0131724	0.00397641	0.0013	254591
235	113975347	114011710	Yes	rs4936290	11	114009255	A	C	0.6584	0.0119	0.6496	0.6744	697828	-0.0229	0.97736	-6.735	-6.426	1.641e-11	1.312e-10	--	47.8	1.917	1	0.1662	697828	[ZBTB16]	-0.0189195	0.00651431	0.00368111	248094	-0.0177058	0.00282752	4.6e-10	449734	-0.0152024	0.0036967	4.3e-05	254591
236	122089589	122198078	Yes	rs3867239	11	122093090	A	G	0.3762	0.0043	0.3704	0.3794	697828	0.0262	1.02655	7.033	6.711	2.016e-12	1.938e-11	++	32.8	1.488	1	0.2225	697828	BLID---[]---UBASH3B	0.0318099	0.00614935	2.30312e-07	248094	0.0139675	0.00277918	8.7e-07	449734	0.0121941	0.00363612	0.0012	254591
237	122811822	122845954	Yes	rs74357745	11	122811822	A	G	0.8803	0.002	0.8788	0.883	697828	0.0312	1.03169	6.56	6.259	5.39e-11	3.881e-10	++	76.2	4.199	1	0.04044	697828	[C11orf63]	0.0213078	0.00940312	0.0234372	248094	0.026546	0.00412156	8.7e-11	449734	0.0210033	0.00538714	9.4e-05	254591
238	126652757	126763514	Yes	rs7943634	11	126734319	T	C	0.3075	0.0024	0.3042	0.3093	697828	-0.0235	0.976774	-6.429	-6.134	1.281e-10	8.549e-10	--	0	0.737	1	0.3906	697828	[KIRREL3]	-0.0204075	0.00649054	0.00166438	248094	-0.016455	0.00291003	1.4e-08	449734	-0.01527	0.00380936	6.8e-05	254591
239	345175	516346	Yes	rs3782860	12	361996	T	C	0.543	0.0067	0.534	0.548	697828	0.025	1.02532	6.857	6.542	7.048e-12	6.068e-11	++	0	0.847	1	0.3575	697828	[SLC6A13]	0.0288571	0.00597866	1.38627e-06	248094	0.0132079	0.00270465	7.2e-07	449734	0.0162974	0.0035405	3.4e-06	254591
240	16286082	16301572	Yes	rs1799464	12	16286082	A	G	0.2868	0.0042	0.2811	0.2899	697828	-0.02	0.980199	-5.816	-5.55	6.011e-09	2.864e-08	--	0	0.046	1	0.8294	697828	DERA--[]--SLC15A5	-0.0245609	0.0067461	0.000271546	248094	-0.0135299	0.00296926	5.6e-06	449734	-0.0110029	0.00388202	0.0035	254591
241	16869088	17095055	Yes	rs12298405	12	17015267	T	C	0.3301	0.0049	0.3265	0.3367	697828	-0.0234	0.976872	-6.695	-6.388	2.157e-11	1.683e-10	--	0	0.096	1	0.7561	697828	LMO3---[]	-0.0235983	0.00630571	0.00018213	248094	-0.0158538	0.00286448	2.7e-08	449734	-0.0193162	0.00375287	2.4e-07	254591
242	23027722	23068137	Yes	rs2433634	12	23060363	A	C	0.7241	0.008	0.7181	0.7348	697828	-0.0268	0.973556	-6.533	-6.233	6.442e-11	4.566e-10	--	0	0.055	1	0.8153	697828	ETNK1---[]---SOX5	-0.0278826	0.00682899	4.44725e-05	248094	-0.0153307	0.00298813	3.3e-07	449734	-0.0108816	0.00391329	0.0058	254591
243	24019613	24109198	Yes	rs11611435	12	24089322	T	C	0.5561	0.0064	0.5513	0.5648	697828	0.0278	1.02819	6.843	6.529	7.75e-12	6.617e-11	++	0	0.194	1	0.6596	697828	[SOX5]	0.0224573	0.00602646	0.000194085	248094	0.0157403	0.00270297	8.6e-09	449734	0.0163468	0.0035318	3.2e-06	254591
244	33266229	34856380	Yes	rs13377754	12	34051765	T	C	0.6104	0.0027	0.6068	0.6124	697828	0.0485	1.0497	13.919	13.28	4.854e-44	3.01e-40	++	0	0.54	1	0.4624	697828	SYT10---[]---ALG10	0.0546396	0.00614808	6.15185e-19	248094	0.0297291	0.00275916	6.9e-27	449734	0.0263689	0.00361075	2.1e-13	254591
245	37856814	40006177	No	rs1843888	12	38737310	A	G	0.5433	0.0081	0.5325	0.5493	697828	0.0513	1.05264	14.469	13.806	1.889e-47	2.361e-43	++	66	2.942	1	0.08632	697828	ALG10B--[]---CPNE8	0.0600724	0.00600595	1.45702e-23	248094	0.0288388	0.00270621	3.2e-26	449734	0.024922	0.00354637	2.7e-12	254591
246	46086071	46454899	Yes	rs247929	12	46294908	C	G	0.5081	0.0039	0.5052	0.5134	697828	0.031	1.03149	8.792	8.388	1.473e-18	4.933e-17	++	0	0.758	1	0.384	697828	[ARID2]	0.0355621	0.0059863	2.83195e-09	248094	0.0177077	0.0026901	6.2e-11	449734	0.016088	0.00351897	4.7e-06	254591
247	49413486	49451459	Yes	rs7975791	12	49413486	T	C	0.0384	0.0013	0.0367	0.0394	697828	0.0513	1.05264	6.127	5.846	8.938e-10	5.031e-09	++	0	0.125	1	0.7236	697828	[KMT2D]	0.0535517	0.0158923	0.000752981	248094	0.034566	0.00689894	2.9e-07	449734	0.0372844	0.00903041	3.3e-05	254591
248	52027204	52221783	Yes	rs4761989	12	52042142	T	C	0.868	0.0013	0.8663	0.8689	697828	-0.0333	0.967248	-6.452	-6.156	1.105e-10	7.471e-10	--	0	0.233	1	0.6293	697828	[SCN8A]	-0.0369601	0.00872814	2.29114e-05	248094	-0.0191328	0.00398363	1e-06	449734	-0.0191557	0.00520043	0.00016	254591
249	54595546	54774379	Yes	rs7299922	12	54702519	A	G	0.6388	0.011	0.6307	0.6536	697828	0.0239	1.02419	6.876	6.56	6.171e-12	5.376e-11	++	0	0.549	1	0.4588	697828	NFE2-[]--COPZ1	0.0225376	0.00643063	0.000456749	248094	0.016149	0.00279944	2.5e-09	449734	0.0137456	0.00366103	0.00011	254591
250	57682956	57851182	Yes	rs487722	12	57824165	T	G	0.2084	0.0049	0.2019	0.2121	697828	0.0273	1.02768	6.304	6.014	2.906e-10	1.805e-09	++	0	0.21	1	0.6464	697828	R3HDM2---[]-INHBC	0.0256326	0.00756034	0.000698088	248094	0.0174608	0.00329114	9.6e-08	449734	0.013204	0.00430626	0.0017	254591
251	63453612	63644087	Yes	rs10877962	12	63520912	T	C	0.4083	0.0083	0.3972	0.4145	697828	0.0359	1.03655	9.105	8.688	8.594e-20	3.702e-18	++	90.6	10.664	1	0.001093	697828	PPM1H---[]--AVPR1A	0.049402	0.00613697	8.23125e-16	248094	0.0145449	0.00273885	8.2e-08	449734	0.0133605	0.00358226	0.00013	254591
252	77957397	77983182	Yes	rs711098	12	77976559	A	C	0.3979	0.0075	0.3879	0.4035	697828	0.0217	1.02194	6.095	5.815	1.097e-09	6.065e-09	++	80.6	5.146	1	0.02329	697828	E2F7---[]---NAV3	0.0334374	0.00612973	4.89224e-08	248094	0.0096375	0.00274587	0.0004	449734	0.00920984	0.00359372	0.01	254591
253	90109321	90564295	Yes	rs7959983	12	90452978	T	C	0.5955	0.0005	0.5948	0.5959	697828	-0.0299	0.970543	-8.514	-8.123	1.68e-17	4.535e-16	--	0	0.258	1	0.6118	697828	ATP2B1---[]---CCER1	-0.0283325	0.00606814	3.02413e-06	248094	-0.0195258	0.00272849	9.5e-13	449734	-0.0149108	0.00356963	2.3e-05	254591
254	106986593	107521770	Yes	rs7304278	12	106989915	A	G	0.2827	0.0106	0.2748	0.2971	697828	-0.0291	0.971319	-8.055	-7.685	7.97e-16	1.529e-14	--	0	0.144	1	0.7048	697828	POLR3B--[]-RFX4	-0.0296209	0.0065852	6.84222e-06	248094	-0.020255	0.00302264	2.2e-11	449734	-0.0137161	0.00395123	0.00046	254591
255	112047571	112985328	Yes	rs7298532	12	112510404	T	C	0.7213	0.0046	0.7179	0.7275	697828	0.027	1.02737	6.723	6.414	1.785e-11	1.416e-10	++	0	0.075	1	0.7846	697828	[NAA25]	0.0252294	0.00665921	0.000151282	248094	0.0164304	0.00298282	2.7e-08	449734	0.0106096	0.00390502	0.0056	254591
256	114276987	114343818	Yes	rs3955311	12	114343818	T	C	0.1491	0.0025	0.1458	0.151	697828	0.026	1.02634	5.825	5.558	5.71e-09	2.733e-08	++	0	0.091	1	0.7633	697828	[RBM19]	0.0314416	0.00846333	0.000203232	248094	0.0167632	0.00376823	6.9e-06	449734	0.0194263	0.00494586	7.1e-05	254591
257	120886221	121142042	No	rs80097534	12	121029604	T	G	0.0966	0.0026	0.093	0.0985	697828	-0.0357	0.96493	-6.23	-5.944	4.656e-10	2.775e-09	--	71.6	3.524	1	0.06047	697828	POP5--[]--CABP1	-0.0239459	0.0108475	0.0272621	248094	-0.0281025	0.00455453	9.3e-10	449734	-0.0296439	0.00594447	6.1e-07	254591
258	55606671	56418447	Yes	rs9597241	13	56281271	A	C	0.8106	0.001	0.8093	0.8113	697828	0.0332	1.03376	7.808	7.449	5.831e-15	9.385e-14	++	0	0.036	1	0.8501	697828	[]	0.0365032	0.00759499	1.53201e-06	248094	0.0213884	0.00345609	7.5e-10	449734	0.0214165	0.00452739	1.6e-06	254591
259	59090318	59706143	Yes	rs12871550	13	59576365	A	G	0.3229	0.0017	0.3216	0.3252	697828	0.0268	1.02716	7.419	7.078	1.182e-13	1.459e-12	++	0	0.426	1	0.5138	697828	[]---DIAPH3	0.0315214	0.00637107	7.51034e-07	248094	0.0159966	0.00287516	2.6e-08	449734	0.00890435	0.00375895	0.029	254591
260	66586694	66622668	Yes	rs9571526	13	66590868	T	G	0.7706	0.0019	0.7692	0.7731	697828	-0.0272	0.973167	-6.124	-5.843	9.15e-10	5.14e-09	--	1.7	1.018	1	0.3131	697828	[]---PCDH9	-0.0318266	0.00713411	8.15386e-06	248094	-0.013418	0.00319269	1.6e-05	449734	-0.0127266	0.00416614	0.0017	254591
261	69779070	70146864	Yes	rs2593487	13	69903058	A	G	0.3361	0.0062	0.3278	0.3407	697828	-0.0285	0.971902	-7.371	-7.033	1.697e-13	2.029e-12	--	38.4	1.622	1	0.2027	697828	[]---KLHL1	-0.0344846	0.00636624	6.04616e-08	248094	-0.014844	0.00284306	2.5e-07	449734	-0.0145717	0.00372161	5.9e-05	254591
262	72913795	72952328	Yes	rs495593	13	72919800	A	G	0.7383	0.0062	0.7299	0.743	697828	0.0226	1.02286	6.182	5.899	6.322e-10	3.668e-09	++	44	1.787	1	0.1813	697828	DACH1---[]---MZT1	0.0319638	0.00671688	1.94275e-06	248094	0.0128799	0.00308061	3.1e-05	449734	0.0146078	0.00402863	0.0005	254591
263	73637457	73649152	Yes	rs45597035	13	73649152	A	G	0.6469	0.0085	0.6354	0.6532	697828	-0.0222	0.978045	-5.882	-5.612	4.058e-09	2.001e-08	--	0	0.017	1	0.8975	697828	[KLF5]	-0.0226541	0.00627456	0.000305594	248094	-0.0129641	0.00284536	3.4e-06	449734	-0.0105154	0.00372188	0.0041	254591
264	77461125	78055051	No	rs9573980	13	77590741	A	G	0.9659	0.0005	0.9652	0.9663	697828	0.1265	1.13485	13.134	12.531	2.102e-39	5.03e-36	++	57	2.325	1	0.1273	697828	[FBXL3]	0.149818	0.0165713	1.3624e-19	248094	0.0727085	0.00745314	5.7e-22	449734	0.0826296	0.00973725	3.9e-17	254591
265	93406584	94119451	Yes	rs1886205	13	94062095	A	C	0.7604	0.0011	0.7595	0.7619	697828	0.0293	1.02973	7.864	7.503	3.733e-15	6.249e-14	++	0	0.023	1	0.8793	697828	[GPC6]	0.0337325	0.00701298	1.50457e-06	248094	0.0194352	0.00316104	4.9e-10	449734	0.018149	0.00413905	7.6e-06	254591
266	107700218	107700218	Yes	rs9558942	13	107700218	T	C	0.6722	0.002	0.6695	0.6737	697828	-0.0192	0.980983	-5.736	-5.473	9.698e-09	4.432e-08	--	76.2	4.207	1	0.04027	697828	ARGLU1---[]---FAM155A	-0.0320356	0.00632301	4.04986e-07	248094	-0.00987018	0.00286731	0.00072	449734	-0.00503269	0.00375183	0.17	254591
267	109779906	109790422	Yes	rs3815983	13	109779906	T	C	0.3604	0.001	0.3597	0.3618	697828	-0.0216	0.978632	-6.548	-6.248	5.83e-11	4.169e-10	--	0	0	1	0.9944	697828	[MYO16]	-0.0246948	0.00631636	9.23355e-05	248094	-0.0148253	0.00282602	1.5e-07	449734	-0.0106838	0.00369841	0.0026	254591
268	112225701	112239761	Yes	rs1163628	13	112226420	A	C	0.8572	0.0007	0.8563	0.8578	697828	-0.0287	0.971708	-6.187	-5.903	6.138e-10	3.571e-09	--	0	0.068	1	0.7942	697828	TEX29---[]---SOX1	-0.03305	0.00847767	9.68479e-05	248094	-0.0188411	0.0038478	1.5e-06	449734	-0.016437	0.00503302	0.0011	254591
269	42069889	42179732	Yes	rs61990287	14	42069889	A	C	0.2742	0.0112	0.2591	0.2826	697828	0.0248	1.02511	6.096	5.816	1.091e-09	6.035e-09	++	0	0.139	1	0.7088	697828	[]-LRFN5	0.0267862	0.00680831	8.34392e-05	248094	0.0138179	0.00299613	3e-06	449734	0.0110484	0.00391232	0.0056	254591
270	55347827	55602276	Yes	rs2878172	14	55373670	A	G	0.5693	0.0037	0.5665	0.5742	697828	-0.0213	0.978925	-6.071	-5.792	1.271e-09	6.937e-09	--	62.1	2.637	1	0.1044	697828	GCH1-[]--WDHD1	-0.0296115	0.00601457	8.50095e-07	248094	-0.0104137	0.00272883	9.4e-05	449734	-0.00809529	0.00356698	0.02	254591
271	57269825	57444579	Yes	rs962961	14	57281154	T	C	0.3308	0.0043	0.3275	0.3366	697828	-0.0219	0.978338	-6.911	-6.594	4.818e-12	4.289e-11	--	0	0.012	1	0.9145	697828	OTX2-[]---EXOC5	-0.0254204	0.00630124	5.47312e-05	248094	-0.0159069	0.00286872	2e-08	449734	-0.020991	0.00374513	1.1e-08	254591
272	60699368	61108825	Yes	rs6573308	14	60806976	T	C	0.3941	0.0091	0.3873	0.4064	697828	0.0248	1.02511	5.996	5.721	2.016e-09	1.057e-08	++	0	0.848	1	0.3572	697828	PPM1A--[]--C14orf39	0.0263219	0.00610069	1.59846e-05	248094	0.0119069	0.00277713	2e-05	449734	0.00694751	0.0036277	0.048	254591
273	62438612	62466304	Yes	rs7143933	14	62460219	T	G	0.2615	0.0025	0.2582	0.2634	697828	0.0246	1.02491	6.082	5.803	1.187e-09	6.517e-09	++	66.9	3.021	1	0.08218	697828	SNAPC1---[]-SYT16	0.0340685	0.00678413	5.11867e-07	248094	0.0113763	0.00305185	0.00012	449734	0.0121889	0.0039862	0.0025	254591
274	64742218	64927967	Yes	rs2978382	14	64769074	T	C	0.5852	0.0066	0.5763	0.5901	697828	0.0232	1.02347	6.083	5.804	1.178e-09	6.472e-09	++	0	0.031	1	0.8609	697828	ESR2-[]--MTHFD1	0.0210824	0.00604712	0.000489371	248094	0.0139992	0.00274141	6.1e-07	449734	0.0110379	0.00358709	0.0023	254591
275	74255556	74669893	Yes	rs4903203	14	74660508	A	G	0.3237	0.0029	0.3216	0.3275	697828	0.0247	1.02501	6.697	6.389	2.132e-11	1.665e-10	++	0	0.06	1	0.8058	697828	[LIN52]	0.0267024	0.00637249	2.7861e-05	248094	0.0145042	0.00287892	1.7e-07	449734	0.0114826	0.00377021	0.0022	254591
276	79452019	79452019	Yes	rs12436039	14	79452019	T	C	0.8801	0.0035	0.8753	0.8827	697828	0.0332	1.03376	5.806	5.54	6.398e-09	3.032e-08	++	79.6	4.914	1	0.02664	697828	[NRXN3]	0.0484335	0.00924301	1.59311e-07	248094	0.0143341	0.00422728	0.00084	449734	0.00766918	0.00552786	0.16	254591
277	85320187	85391901	Yes	rs4550384	14	85350142	T	G	0.758	0.0048	0.7544	0.7645	697828	0.0237	1.02398	6.319	6.029	2.627e-10	1.646e-09	++	0	0.048	1	0.827	697828	[]---FLRT2	0.0279533	0.00708935	8.03361e-05	248094	0.0157213	0.00313024	7.7e-07	449734	0.0206976	0.00409325	6e-07	254591
278	98532540	98667928	Yes	rs710284	14	98532540	T	C	0.5797	0.0071	0.5702	0.585	697828	0.022	1.02224	5.898	5.628	3.671e-09	1.826e-08	++	0	0.53	1	0.4665	697828	[]---C14orf177	0.0246638	0.00601365	4.10474e-05	248094	0.0119132	0.00273187	1.7e-05	449734	0.0117418	0.00357285	0.00083	254591
279	100795338	101055232	Yes	rs11845599	14	101016824	A	G	0.6353	0.0002	0.6351	0.6355	697828	-0.0274	0.972972	-7.567	-7.22	3.826e-14	5.216e-13	--	14.1	1.164	1	0.2805	697828	[BEGAIN]	-0.0342793	0.00637414	7.53035e-08	248094	-0.0152885	0.00281767	5.6e-08	449734	-0.018014	0.00368545	5.1e-07	254591
280	47995736	48098423	Yes	rs59986227	15	48009263	C	G	0.7493	0.0096	0.7422	0.7623	697828	-0.0307	0.969766	-7.084	-6.759	1.398e-12	1.388e-11	--	0	0.016	1	0.8999	697828	[]-SEMA6D	-0.0292697	0.00709898	3.73901e-05	248094	-0.0178401	0.00310217	8.3e-09	449734	-0.0170196	0.004056	2.5e-05	254591
281	53714701	53755084	Yes	rs12442008	15	53725112	T	C	0.2593	0.0085	0.253	0.2707	697828	0.0285	1.02891	6.884	6.568	5.827e-12	5.102e-11	++	51.4	2.058	1	0.1514	697828	ONECUT1---[]--WDR72	0.0352935	0.0067146	1.46976e-07	248094	0.0142934	0.00311391	3e-06	449734	0.0139294	0.00407441	0.00043	254591
282	58959273	58969292	Yes	rs4775086	15	58969292	A	G	0.2363	0.0025	0.2329	0.2382	697828	-0.0267	0.973653	-5.97	-5.696	2.366e-09	1.223e-08	--	0	0.644	1	0.4222	697828	[ADAM10]	-0.0298909	0.00711046	2.61956e-05	248094	-0.0137624	0.00316622	1.6e-05	449734	-0.0141093	0.00414168	0.00067	254591
283	96907398	96912269	Yes	rs12442674	15	96907819	A	C	0.7296	0.0071	0.7243	0.7391	697828	0.0229	1.02316	6.046	5.769	1.485e-09	7.995e-09	++	67.5	3.075	1	0.07952	697828	NR2F2--[]---SPATA8	0.040114	0.00800357	5.36843e-07	248094	0.0112618	0.00301088	0.00014	449734	0.0146197	0.00394153	0.00022	254591
284	101143981	101156491	Yes	rs1873958	15	101147726	A	G	0.4088	0.0024	0.407	0.4121	697828	0.0279	1.02829	8.3	7.919	1.04e-16	2.389e-15	++	81.5	5.391	1	0.02024	697828	[ASB7]	0.0413986	0.00607689	9.5574e-12	248094	0.014117	0.0027541	1.3e-07	449734	0.0135886	0.00360062	0.0002	254591
285	728514	731725	Yes	rs72773411	16	728514	A	G	0.1529	0.0091	0.1407	0.1597	697828	0.0293	1.02973	5.823	5.556	5.784e-09	2.765e-08	++	0	0.547	1	0.4595	697828	RHBDL1[]-STUB1	0.0352892	0.00867957	4.78889e-05	248094	0.0155734	0.003685	2.3e-05	449734	0.0209526	0.00481593	1.3e-05	254591
286	8188920	8195696	Yes	rs12445235	16	8195278	C	G	0.4098	0.0002	0.4096	0.41	697828	-0.0211	0.979121	-5.95	-5.677	2.688e-09	1.374e-08	--	0	0.215	1	0.6429	697828	RBFOX1---[]---TMEM114	-0.023855	0.00608621	8.86453e-05	248094	-0.0127193	0.00273708	6.8e-06	449734	-0.0127946	0.00358205	0.00031	254591
287	8988777	8988777	Yes	rs2304467	16	8988777	C	G	0.6066	0.0085	0.6002	0.6181	697828	-0.0237	0.976579	-6.075	-5.796	1.239e-09	6.777e-09	--	0	0.261	1	0.6095	697828	[USP7]	-0.0201827	0.00628298	0.00131672	248094	-0.0141095	0.00276055	2.2e-07	449734	-0.0145675	0.00360488	5.1e-05	254591
288	23080634	23156451	Yes	rs11641239	16	23124193	T	C	0.2854	0.0042	0.2798	0.2886	697828	0.0229	1.02316	6.141	5.859	8.196e-10	4.648e-09	++	42.2	1.731	1	0.1883	697828	[USP31]	0.0173937	0.00667597	0.00917701	248094	0.0172486	0.00296753	1.1e-08	449734	0.013971	0.00388427	0.00034	254591
289	24512509	24613187	Yes	rs7203707	16	24518569	A	C	0.5193	0.0046	0.5159	0.5256	697828	-0.0197	0.980493	-6.518	-6.219	7.116e-11	5e-10	--	58	2.382	1	0.1227	697828	CACNG3---[]--RBBP6	-0.015903	0.00600704	0.00811063	248094	-0.0164726	0.00269903	7.6e-10	449734	-0.0141101	0.00353271	5.8e-05	254591
290	49149191	49521308	Yes	rs4785296	16	49467234	C	G	0.231	0.0008	0.23	0.2316	697828	0.0264	1.02675	6.351	6.06	2.139e-10	1.365e-09	++	0	0.188	1	0.6643	697828	C16orf78--[]--ZNF423	0.0292082	0.0070631	3.54528e-05	248094	0.0151759	0.00318655	1.3e-06	449734	0.0123082	0.00416167	0.0036	254591
291	52093027	52166707	Yes	rs3743794	16	52112312	A	G	0.6073	0.0017	0.6061	0.6096	697828	-0.0215	0.978729	-6.083	-5.804	1.18e-09	6.482e-09	--	0	0.119	1	0.7302	697828	C16orf97-[]---TOX3	-0.020505	0.00612066	0.000807647	248094	-0.0140733	0.00276271	3.6e-07	449734	-0.0161226	0.00361435	9.3e-06	254591
292	52684916	52913166	No	rs12927162	16	52684916	A	G	0.7276	0.0082	0.7216	0.7386	697828	0.0561	1.0577	13.504	12.884	1.484e-41	5.524e-38	++	76.3	4.215	1	0.04007	697828	TOX3---[]---CHD9	0.0656397	0.0067695	3.01553e-22	248094	0.0286498	0.00300067	6.8e-22	449734	0.0250092	0.00392535	1.3e-10	254591
293	53797908	53848561	Yes	rs1421085	16	53800954	T	C	0.5935	0.0045	0.5875	0.5969	697828	-0.0419	0.958966	-12.354	-11.787	4.651e-35	4.563e-32	--	0	0.02	1	0.8879	697828	[FTO]	-0.0438753	0.00605001	4.08247e-13	248094	-0.0275621	0.00274075	1.5e-23	449734	-0.0260858	0.00358697	3.6e-13	254591
294	56116844	56374137	Yes	rs2550298	16	56367969	T	C	0.3811	0.0053	0.3772	0.3882	697828	-0.04	0.960789	-11.047	-10.54	2.278e-28	5.67e-26	--	0	0.088	1	0.7661	697828	[GNAO1]	-0.0429258	0.00629003	8.77051e-12	248094	-0.0239989	0.0027767	3.6e-18	449734	-0.0255335	0.00363695	1.6e-12	254591
295	60584609	60743834	Yes	rs8044054	16	60628436	T	C	0.3878	0.0017	0.3855	0.389	697828	0.0307	1.03118	8.748	8.346	2.18e-18	7.051e-17	++	0	0.008	1	0.9305	697828	[]	0.0313904	0.00610042	2.66397e-07	248094	0.019218	0.00275723	1.5e-12	449734	0.0223585	0.00360342	5.6e-10	254591
296	67870279	68153492	Yes	rs72790386	16	68136932	T	G	0.0338	0.0008	0.0332	0.0349	697828	0.0604	1.06226	5.876	5.606	4.204e-09	2.067e-08	++	0	0.487	1	0.4852	697828	[NFATC3]	0.0709106	0.0174499	4.82631e-05	248094	0.0311989	0.00751134	1.7e-05	449734	0.0294036	0.00974736	0.0022	254591
297	71472571	72450482	Yes	rs17604349	16	72210865	A	G	0.1848	0.0076	0.1792	0.195	697828	-0.0374	0.963291	-9.417	-8.985	4.624e-21	2.581e-19	--	0	0.101	1	0.7503	697828	PMFBP1-[]---ZFHX3	-0.0440948	0.00751272	4.34138e-09	248094	-0.0257422	0.00351443	1.7e-13	449734	-0.0237146	0.0045997	1.6e-07	254591
298	8030929	8180198	Yes	rs1061032	17	8064083	T	G	0.094	0.0073	0.0886	0.1039	697828	0.0644	1.06652	10.47	9.99	1.185e-25	1.691e-23	++	0	0.094	1	0.7586	697828	[VAMP2]	0.064662	0.00996419	8.60908e-11	248094	0.0387677	0.00477391	2e-16	449734	0.0438007	0.00621407	1.1e-12	254591
299	17332469	17762970	No	rs11545787	17	17398278	A	G	0.2482	0.003	0.2441	0.2504	697828	-0.0498	0.95142	-11.948	-11.4	6.662e-33	4.2e-30	--	91.6	11.903	1	0.0005605	697828	[RASD1]	-0.0704617	0.00712482	4.43482e-23	248094	-0.0238098	0.0031377	4.9e-14	449734	-0.0226799	0.00410465	5.2e-08	254591
300	30603994	30603994	Yes	rs12950382	17	30603994	A	G	0.7198	0.0067	0.7107	0.7247	697828	0.0234	1.02368	5.725	5.463	1.033e-08	4.695e-08	++	0	0.64	1	0.4238	697828	[RHBDL3]	0.027047	0.00666936	4.9969e-05	248094	0.0126178	0.0030171	3.8e-05	449734	0.0105226	0.00394486	0.0071	254591
301	31615996	31625887	Yes	rs4365329	17	31625887	A	T	0.5383	0.0038	0.5332	0.5412	697828	-0.0194	0.980787	-5.829	-5.561	5.585e-09	2.678e-08	--	0	0.762	1	0.3827	697828	[ASIC2]	-0.0250046	0.00598758	2.96384e-05	248094	-0.0108304	0.00270572	3.2e-05	449734	-0.0154499	0.00353575	1.3e-05	254591
302	33824903	34067306	Yes	rs2011528	17	33980566	T	C	0.8254	0.0081	0.8145	0.8314	697828	-0.0329	0.967635	-6.958	-6.639	3.452e-12	3.165e-11	--	0	0.178	1	0.673	697828	[AP2B1]	-0.0294233	0.00772271	0.00013903	248094	-0.0206881	0.00359054	5.3e-09	449734	-0.0242921	0.00468969	2.9e-07	254591
303	42923398	43051948	Yes	rs3760381	17	43047083	A	G	0.2544	0.0052	0.2505	0.2614	697828	0.0274	1.02778	6.562	6.26	5.327e-11	3.84e-10	++	0	0.368	1	0.5442	697828	C1QL1-[]--DCAKD	0.0300707	0.0068354	1.08628e-05	248094	0.0150351	0.00311595	9.3e-07	449734	0.0140854	0.00407798	0.00049	254591
304	44189067	44289832	Yes	rs7225002	17	44189067	A	G	0.5916	0.009	0.5849	0.6037	697828	-0.0179	0.982259	-5.73	-5.468	1.001e-08	4.562e-08	--	0	0	1	0.9945	697828	[KANSL1]	-0.0208146	0.00608207	0.00062085	248094	-0.0127998	0.00273339	4.3e-06	449734	-0.0113597	0.00357507	0.0028	254591
305	45053525	45281257	Yes	rs12600452	17	45054564	A	G	0.2015	0.0059	0.1936	0.2059	697828	0.0255	1.02583	6.273	5.985	3.534e-10	2.158e-09	++	0	1	1	0.3173	697828	GOSR2--[]RPRML	0.034285	0.00754601	5.53668e-06	248094	0.0145936	0.00332908	9e-06	449734	0.0155758	0.00435764	0.0005	254591
306	45949338	46950496	Yes	rs12051	17	46103760	A	G	0.6119	0.0007	0.611	0.6125	697828	-0.0264	0.973945	-7.577	-7.229	3.544e-14	4.864e-13	--	10.8	1.121	1	0.2898	697828	[COPZ2]	-0.0327365	0.00609918	7.98023e-08	248094	-0.014573	0.0027634	5e-08	449734	-0.0137613	0.00361117	0.00011	254591
307	50021543	50317276	Yes	rs55846845	17	50092201	A	G	0.5177	0.0072	0.5079	0.5231	697828	-0.021	0.979219	-6.896	-6.58	5.335e-12	4.707e-11	--	0	0.524	1	0.469	697828	[CA10]	-0.0210206	0.0059539	0.00041452	248094	-0.016	0.00269305	2.4e-09	449734	-0.014333	0.00352375	3.8e-05	254591
308	54150705	54294106	Yes	rs72829706	17	54173733	A	G	0.96	0.0008	0.9589	0.9606	697828	0.0563	1.05792	6.744	6.434	1.544e-11	1.241e-10	++	0	0.52	1	0.4707	697828	PCTP---[]--ANKFN1	0.0524632	0.015248	0.000577729	248094	0.0407112	0.00693598	5.1e-09	449734	0.0297398	0.0090779	0.001	254591
309	55730637	55734198	Yes	rs8072058	17	55734198	A	T	0.7812	0.0007	0.7802	0.7817	697828	-0.0281	0.972291	-6.033	-5.756	1.607e-09	8.593e-09	--	0	0.905	1	0.3415	697828	[MSI2]	-0.0313749	0.00719443	1.29497e-05	248094	-0.0141918	0.0032573	1.9e-05	449734	-0.00757534	0.00426258	0.071	254591
310	56708979	57207540	Yes	rs412000	17	56709058	C	G	0.555	0.0026	0.5515	0.5568	697828	-0.0224	0.977849	-6.317	-6.027	2.669e-10	1.67e-09	--	0	0.266	1	0.6062	697828	[TEX14]	-0.0249729	0.00597412	2.91127e-05	248094	-0.0129775	0.00270849	1.9e-06	449734	-0.0124571	0.00354447	0.00036	254591
311	57838040	58042606	Yes	rs58681483	17	57934654	A	G	0.918	0.0063	0.9095	0.9227	697828	0.0352	1.03583	6.012	5.736	1.833e-09	9.689e-09	++	77.8	4.507	1	0.03377	697828	VMP1--[]-TUBD1	0.0550831	0.0104183	1.23044e-07	248094	0.0180297	0.00503574	0.00037	449734	0.0196032	0.0065885	0.0025	254591
312	60977783	61532571	Yes	rs72841368	17	61391114	A	T	0.8104	0.002	0.8077	0.8119	697828	-0.0301	0.970348	-6.998	-6.677	2.6e-12	2.444e-11	--	0	0.052	1	0.8189	697828	[TANC2]	-0.0302764	0.00759036	6.64285e-05	248094	-0.0197592	0.00344327	8.7e-09	449734	-0.0243153	0.00449466	6.3e-08	254591
313	65460137	65482109	Yes	rs2916148	17	65482109	A	G	0.4522	0.0056	0.4447	0.4564	697828	0.0279	1.02829	7.961	7.596	1.709e-15	3.065e-14	++	0	0.661	1	0.4163	697828	[PITPNC1]	0.0332298	0.00615481	6.69214e-08	248094	0.0162149	0.0027342	3.5e-09	449734	0.0212188	0.00357824	2.7e-09	254591
314	1811417	1828414	Yes	rs2580160	18	1816036	A	G	0.5554	0.0033	0.553	0.5598	697828	0.0283	1.0287	6.926	6.608	4.321e-12	3.884e-11	++	0	0.018	1	0.8937	697828	ADCYAP1---[]---METTL4	0.024154	0.0060049	5.75686e-05	248094	0.0153499	0.00273342	1.7e-08	449734	0.0144635	0.00357428	6.3e-05	254591
315	5155552	5196888	Yes	rs62082402	18	5186566	T	G	0.1936	0.0052	0.191	0.204	562500	0.05	1.05127	9.303	8.876	1.361e-20	6.903e-19	++	51	2.04	1	0.1533	562500	[C18orf42]	0.0603222	0.0110821	5.25493e-08	112766	0.0256161	0.00342345	1.6e-14	449734	0.0246148	0.00446837	2.3e-08	254591
316	21074922	21165163	Yes	rs1788784	18	21159630	A	G	0.3442	0.0003	0.344	0.3446	697828	-0.0273	0.973069	-6.567	-6.265	5.146e-11	3.72e-10	--	92.2	12.803	1	0.0003461	697828	[NPC1]	-0.042697	0.00629117	1.13788e-11	248094	-0.00820945	0.00283533	0.0017	449734	-0.00399565	0.00370409	0.24	254591
317	22615902	22648505	Yes	rs1013987	18	22630836	T	C	0.4033	0.0036	0.3984	0.406	697828	-0.0291	0.971319	-7.557	-7.211	4.11e-14	5.567e-13	--	23.3	1.304	1	0.2535	697828	HRH4---[]--ZNF521	-0.0219199	0.00610688	0.000331262	248094	-0.0182666	0.00274466	1.5e-11	449734	-0.0214329	0.00359218	1.5e-09	254591
318	31525336	32342346	No	rs4419127	18	31663654	A	G	0.6622	0.0038	0.657	0.665	697828	0.0444	1.0454	11.889	11.343	1.352e-32	8.003e-30	++	89.5	9.507	1	0.002046	697828	[NOL4]	0.0599566	0.00627073	1.13079e-21	248094	0.0218058	0.00285599	1.3e-14	449734	0.020638	0.00373622	1.9e-08	254591
319	35721140	36361575	Yes	rs9950528	18	35762461	A	G	0.6505	0.0014	0.6486	0.6516	697828	-0.0235	0.976774	-6.154	-5.871	7.57e-10	4.323e-09	--	0	0.214	1	0.6434	697828	CELF4---[]	-0.0251276	0.00621841	5.32544e-05	248094	-0.0132729	0.0028552	3.1e-06	449734	-0.0154491	0.00373455	4.1e-05	254591
320	38016818	38501444	Yes	rs12969848	18	38152835	T	C	0.5313	0.002	0.5299	0.534	697828	0.0355	1.03614	10.031	9.57	1.117e-23	1.064e-21	++	0	0.009	1	0.9225	697828	[]	0.0363424	0.00599862	1.3699e-09	248094	0.0218632	0.00270301	1.3e-15	449734	0.0199382	0.00353649	4.1e-08	254591
321	44773382	44773382	Yes	rs9956387	18	44773382	A	T	0.4953	0.0017	0.4931	0.4965	697828	-0.0198	0.980395	-5.829	-5.562	5.568e-09	2.671e-08	--	0	0.338	1	0.561	697828	[SKOR2]	-0.0181297	0.00602528	0.00262109	248094	-0.0132831	0.00269715	5e-07	449734	-0.00721283	0.00352861	0.041	254591
322	53041903	53585664	Yes	rs4800998	18	53429655	A	T	0.1827	0.0043	0.1769	0.1859	697828	0.0394	1.04019	7.905	7.542	2.689e-15	4.634e-14	++	89.9	9.89	1	0.001662	697828	TCF4---[]---TXNL1	0.0567029	0.00783456	4.56096e-13	248094	0.0155097	0.00346394	7.8e-06	449734	0.0144295	0.00452078	0.0014	254591
323	56759170	56839530	No	rs9964420	18	56824041	A	C	0.2983	0.0083	0.2871	0.3045	697828	-0.0488	0.952372	-13.389	-12.775	6.966e-41	2.259e-37	--	73.4	3.762	1	0.05242	697828	[SEC11C]	-0.06402	0.00671247	1.41865e-21	248094	-0.0284801	0.00293643	8.6e-22	449734	-0.0231784	0.00384034	1.3e-09	254591
324	60238668	60264354	Yes	rs11152350	18	60240352	A	C	0.467	0.0054	0.4597	0.471	697828	-0.0281	0.972291	-7.774	-7.417	7.629e-15	1.199e-13	--	0	0.084	1	0.7715	697828	[ZCCHC2]	-0.0290102	0.00595944	1.12598e-06	248094	-0.0163037	0.00269517	1.3e-09	449734	-0.0132183	0.00352448	0.00026	254591
325	64296135	64531936	Yes	rs34329963	18	64526233	T	C	0.113	0.0011	0.1116	0.1138	697828	-0.0318	0.9687	-5.969	-5.695	2.389e-09	1.234e-08	--	0	0.483	1	0.4873	697828	CDH19---[]---DSEL	-0.038917	0.00945556	3.84462e-05	248094	-0.0181948	0.00423824	1.2e-05	449734	-0.0155142	0.0055499	0.0035	254591
326	73056278	73063971	Yes	rs1025601	18	73056278	T	C	0.3855	0.0009	0.3848	0.3866	697828	-0.0218	0.978436	-5.829	-5.562	5.57e-09	2.672e-08	--	1	1.01	1	0.3149	697828	TSHZ1--[]--SMIM21	-0.0162925	0.00610472	0.00760994	248094	-0.0150716	0.0028031	1.3e-07	449734	-0.014799	0.00366931	5.1e-05	254591
327	2308970	2715556	Yes	rs10402849	19	2695661	T	C	0.2002	0.0016	0.198	0.2014	697828	0.0259	1.02624	6.218	5.933	5.037e-10	2.981e-09	++	38.2	1.619	1	0.2032	697828	[GNG7]	0.0202555	0.00754114	0.00723264	248094	0.0192609	0.00335946	8.9e-09	449734	0.0203919	0.00439286	3.8e-06	254591
328	5799433	5799433	Yes	rs36055559	19	5799433	A	G	0.166	0.0091	0.1538	0.1728	697828	-0.036	0.96464	-7.186	-6.856	6.693e-13	7.089e-12	--	0	0.032	1	0.8576	697828	DUS3L-[]--NRTN	-0.0454808	0.0102721	9.49108e-06	248094	-0.0210912	0.00372199	1.5e-08	449734	-0.0109177	0.00486873	0.02	254591
329	10727014	10867852	Yes	rs7248205	19	10770305	T	C	0.6003	0.0012	0.5987	0.6011	697828	0.0267	1.02706	7.474	7.131	7.78e-14	9.962e-13	++	0	0.704	1	0.4016	697828	[ILF3]	0.031781	0.00619585	2.90006e-07	248094	0.0148995	0.00275446	3.8e-08	449734	0.0138757	0.00360179	0.00015	254591
330	18449238	18471610	Yes	rs9636202	19	18449238	A	G	0.2662	0.0003	0.2658	0.2664	697828	-0.026	0.974335	-6.935	-6.617	4.058e-12	3.668e-11	--	0	0.971	1	0.3243	697828	LSM4--[]-PGPEP1	-0.0227169	0.00679406	0.000826144	248094	-0.0183734	0.00305534	7.5e-10	449734	-0.0142815	0.0039873	0.00019	254591
331	31052954	31052954	Yes	rs73026775	19	31052954	A	G	0.1246	0.0048	0.1182	0.1282	697828	-0.0335	0.967055	-5.868	-5.599	4.405e-09	2.157e-08	--	0	0.313	1	0.5761	697828	ZNF536-[]---TSHZ3	-0.0409945	0.0103858	7.88642e-05	248094	-0.0180299	0.00416989	1.2e-05	449734	-0.00979351	0.00545219	0.063	254591
332	31672086	31704226	Yes	rs4804951	19	31673388	A	G	0.3306	0.0002	0.3304	0.3309	697828	0.0234	1.02368	6.148	5.866	7.833e-10	4.46e-09	++	0	0.225	1	0.6349	697828	ZNF536---[]--TSHZ3	0.0210467	0.00640729	0.00102052	248094	0.0153231	0.0028711	1.8e-07	449734	0.0131352	0.00375154	0.00049	254591
333	41353107	41353107	Yes	rs56113850	19	41353107	T	C	0.4231	0.0014	0.4221	0.425	697828	-0.0229	0.97736	-6.64	-6.335	3.147e-11	2.376e-10	--	46.4	1.864	1	0.1721	697828	[CYP2A6]	-0.0308444	0.00610225	4.30396e-07	248094	-0.0120772	0.00272306	6.3e-06	449734	-0.0119017	0.00355678	0.00068	254591
334	42495457	43093033	Yes	rs58876439	19	42600984	A	G	0.0674	0.0023	0.0643	0.0691	697828	0.0474	1.04854	6.964	6.644	3.312e-12	3.047e-11	++	0	0.112	1	0.7382	697828	[POU2F2]	0.0531241	0.0120172	9.84442e-06	248094	0.0287805	0.00530315	7e-08	449734	0.0231545	0.00691878	0.0011	254591
335	46480155	47015489	Yes	rs11670534	19	47003906	T	C	0.1614	0.0056	0.1539	0.1656	697828	-0.0305	0.96996	-6.504	-6.205	7.83e-11	5.456e-10	--	0	0.811	1	0.3678	697828	[PPP5D1]	-0.0260842	0.00826859	0.00160523	248094	-0.0209755	0.00362802	8.5e-09	449734	-0.0232532	0.00474195	1.7e-06	254591
336	16088701	16274568	Yes	rs6131805	20	16222093	T	G	0.4022	0.004	0.3993	0.4076	697828	0.0257	1.02603	7.055	6.731	1.724e-12	1.68e-11	++	0	0	1	0.9969	697828	MACROD2---[]---KIF16B	0.0259373	0.00616128	2.5558e-05	248094	0.0156349	0.00279935	1.5e-08	449734	0.0160298	0.00365845	9.5e-06	254591
337	17288108	17447875	Yes	rs6131942	20	17348608	A	G	0.418	0.0027	0.4143	0.42	697828	-0.0263	0.974043	-8.451	-8.063	2.885e-17	7.424e-16	--	0	0.267	1	0.6052	697828	[PCSK2]	-0.0329659	0.0060449	4.92502e-08	248094	-0.0175437	0.00273235	9.4e-11	449734	-0.0128324	0.00357515	0.00038	254591
338	20071634	20369928	Yes	rs1474754	20	20077178	A	G	0.2636	0.0059	0.2557	0.268	697828	-0.0214	0.978827	-5.906	-5.635	3.514e-09	1.755e-08	--	0	0.805	1	0.3695	697828	[C20orf26]	-0.0289467	0.00682513	2.21897e-05	248094	-0.0129382	0.00304293	2.6e-05	449734	-0.0159245	0.00397882	6.6e-05	254591
339	21491398	21557043	Yes	rs6047481	20	21539564	A	T	0.6709	0.0025	0.6674	0.6727	697828	0.0253	1.02562	6.195	5.911	5.812e-10	3.397e-09	++	0	0.062	1	0.8031	697828	NKX2-2--[]---PAX1	0.0248285	0.00637615	9.85166e-05	248094	0.0139627	0.00287782	1.4e-06	449734	0.0159472	0.0037578	1.5e-05	254591
340	30853822	31091235	Yes	rs1737893	20	31051699	T	C	0.3805	0.0007	0.38	0.3814	697828	-0.0253	0.975017	-6.786	-6.475	1.151e-11	9.492e-11	--	0	0.352	1	0.5531	697828	[C20orf112]	-0.0279411	0.00617863	6.1105e-06	248094	-0.0141741	0.00278957	3.5e-07	449734	-0.0146801	0.00365162	7.4e-05	254591
341	43497279	43551620	Yes	rs2072727	20	43538733	T	C	0.4327	0.0044	0.4268	0.436	697828	0.0282	1.0286	8.229	7.852	1.885e-16	4.109e-15	++	0	0.624	1	0.4295	697828	[PABPC1L]	0.0333602	0.00602097	3.00882e-08	248094	0.016352	0.00271514	8.5e-10	449734	0.0157367	0.00355434	5.5e-06	254591
342	44656949	44668401	Yes	rs57236847	20	44668401	C	G	0.6029	0.0007	0.602	0.6034	697828	0.0269	1.02727	6.151	5.869	7.686e-10	4.384e-09	++	55.7	2.259	1	0.1328	697828	[SLC12A5]	0.0296855	0.00609053	1.09137e-06	248094	0.011312	0.00275467	5.3e-05	449734	0.0124012	0.00360146	0.0007	254591
343	28848278	28871570	Yes	rs695459	22	28848278	T	C	0.3906	0.0025	0.3888	0.394	697828	-0.022	0.97824	-5.979	-5.705	2.245e-09	1.166e-08	--	0	0.273	1	0.6016	697828	[TTC28]	-0.0191857	0.00609896	0.001656	248094	-0.0140772	0.00276149	3.2e-07	449734	-0.0174194	0.00361086	1.5e-06	254591
344	35844751	35860563	Yes	rs28459838	22	35846168	T	C	0.2369	0.0035	0.2342	0.2416	697828	0.0266	1.02696	6.359	6.067	2.033e-10	1.303e-09	++	0	0.327	1	0.5673	697828	MCM5--[]--RASD2	0.0321442	0.00756202	2.13095e-05	248094	0.0151431	0.00319138	1.9e-06	449734	0.0159782	0.00416847	8.9e-05	254591
345	38851675	38851675	Yes	rs118047999	22	38851675	C	G	0.2459	0.0047	0.2395	0.2494	697828	0.0236	1.02388	5.926	5.654	3.104e-09	1.567e-08	++	74.6	3.931	1	0.04741	697828	KCNJ4--[]--KDELR3	0.0362511	0.00707323	2.974e-07	248094	0.0108419	0.00311793	0.00035	449734	0.0139768	0.00407404	0.00043	254591
346	40534964	41116466	No	rs139911	22	40704052	T	C	0.5722	0.0052	0.5652	0.5761	697828	-0.0336	0.966958	-9.221	-8.798	2.939e-20	1.392e-18	--	69.2	3.25	1	0.07144	697828	[TNRC6B]	-0.0243681	0.00601546	5.09963e-05	248094	-0.0233915	0.00273231	2.3e-17	449734	-0.0200507	0.00356541	1.6e-08	254591
347	41864190	42731540	Yes	rs9611597	22	41864190	A	T	0.8371	0.0031	0.8329	0.8394	697828	0.0374	1.03811	7.336	7	2.197e-13	2.567e-12	++	0	0.189	1	0.6637	697828	[PHF5A]	0.0399707	0.00846386	2.3199e-06	248094	0.0208731	0.00369486	1.8e-08	449734	0.0185806	0.00483594	0.00012	254591
348	45696695	45807907	Yes	rs6007594	22	45728370	A	G	0.2644	0.0078	0.2586	0.2749	697828	-0.025	0.97531	-6.479	-6.181	9.258e-11	6.357e-10	--	0	0.004	1	0.9469	697828	[FAM118A]	-0.0254627	0.00668461	0.00013927	248094	-0.0161294	0.00306305	1.6e-07	449734	-0.0193683	0.00400006	1.6e-06	254591
349	68751721	68751721	Yes	rs3747463	X	68751721	T	C	0.3609	0	0.3609	0.3609	248094	-0.031567	0.968926	-6.212	-5.927	5.23e-10	3.085e-09	?-	0	0	0	1	248094	[FAM155B]	-0.031567	0.00508252	5.23039e-10	248094	-	-	-	-	-	-	-	-
350	81928535	83528570	Yes	rs213462	X	82704455	A	C	0.55	0	0.55	0.55	248094	-0.0363018	0.964349	-7.253	-6.921	4.063e-13	4.497e-12	?-	0	0	0	1	248094	[]--POU3F4	-0.0363018	0.00500506	4.06295e-13	248094	-	-	-	-	-	-	-	-
351	100883195	101448048	Yes	rs7060620	X	101012848	A	T	0.8143	0	0.8143	0.8143	248094	-0.0448533	0.956138	-7.111	-6.785	1.153e-12	1.164e-11	?-	0	0	0	1	248094	ARMCX2--[]--NXF5	-0.0448533	0.0063066	1.15264e-12	248094	-	-	-	-	-	-	-	-
